# Supplementary material for: Optimizing Dosage-Specific Treatments in a Multi-Scale Model of a Tumor Growth
Source: Front Mol Biosci. 2022 Apr 6;9:836794. doi: 10.3389/fmolb.2022.836794 (PMC9019571; doi:10.3389/fmolb.2022.836794)
Supplement: Supplementary file 5 [file Table1.XLSX]

## Sheet: Supplementary_Table_1
Supplementary Table 1. Random uniform sampled and evaluated treatment strategies for 2D and 3D cells arrangements (n=10,000 x 2).
Pulse period (min)	[TNF] ng/L	Pulse Duration (min)	initial_cell_count	final_cell_count	final_cell_relative	Layout	Feasible	Total [TNF] ng/L
438.858	0.087514	5.81316	151	1	0.662252	2D-disc	True	5.00783
501.188	0.103917	6.98922	151	1.33333	0.883002	2D-disc	True	6.26035
224.858	0.051381	7.52953	151	1.33333	0.883002	2D-disc	True	7.43269
500.104	0.088819	9.87681	151	0	0	2D-disc	True	7.57784
306.009	0.12154	5.05371	151	0.666667	0.441501	2D-disc	True	8.67121
455.512	0.05567	18.1677	151	1.33333	0.883002	2D-disc	True	9.59191
219.547	0.027976	18.3828	151	1.33333	0.883002	2D-disc	True	10.1194
482.311	0.043032	26.8115	151	0.666667	0.441501	2D-disc	True	10.334
545.312	0.041682	31.8814	151	0.333333	0.220751	2D-disc	True	10.5275
566.336	0.028193	50.1922	151	1	0.662252	2D-disc	True	10.7941
252.819	0.045318	14.4185	151	0.666667	0.441501	2D-disc	True	11.1651
309.72	0.165603	5.00187	151	0.333333	0.220751	2D-disc	True	11.5535
498.811	0.069233	19.3823	151	1.33333	0.883002	2D-disc	True	11.6216
204.643	0.023961	23.2506	151	1.33333	0.883002	2D-disc	True	11.7605
447.877	0.129115	9.66975	151	0.333333	0.220751	2D-disc	True	12.0425
738.087	0.319132	6.50332	151	1.33333	0.883002	2D-disc	True	12.1473
234.874	0.028622	23.9567	151	1	0.662252	2D-disc	True	12.6117
376.076	0.066505	16.8572	151	1.33333	0.883002	2D-disc	True	12.878
553.977	0.040384	41.3083	151	1	0.662252	2D-disc	True	13.0088
559.424	0.027712	61.5964	151	1	0.662252	2D-disc	True	13.1815
349.95	0.022723	47.4252	151	0.666667	0.441501	2D-disc	True	13.3031
516.905	0.052566	31.9928	151	1.33333	0.883002	2D-disc	True	14.055
281.504	0.157283	5.88219	151	1.33333	0.883002	2D-disc	True	14.1978
424.035	0.22519	6.88014	151	1.33333	0.883002	2D-disc	True	15.7844
291.324	0.031289	34.3808	151	0	0	2D-disc	True	15.952
616.104	0.054929	42.3831	151	0.666667	0.441501	2D-disc	True	16.3239
422.245	0.22559	7.18507	151	1.33333	0.883002	2D-disc	True	16.5833
196.647	0.04017	19.5917	151	0	0	2D-disc	True	17.289
299.522	0.13846	8.67242	151	0	0	2D-disc	True	17.3189
357.346	0.045781	33.1511	151	0.666667	0.441501	2D-disc	True	18.3475
485.76	0.228965	9.13179	151	1	0.662252	2D-disc	True	18.5946
486.529	0.132042	15.9339	151	0.333333	0.220751	2D-disc	True	18.6814
260.885	0.103052	10.9849	151	1	0.662252	2D-disc	True	18.7451
549.685	0.06807	35.0756	151	1.33333	0.883002	2D-disc	True	18.7642
167.307	0.021683	33.5681	151	0.666667	0.441501	2D-disc	True	18.7939
564.879	0.032395	76.1051	151	1.33333	0.883002	2D-disc	True	18.8547
507.928	0.03488	64.0711	151	1.33333	0.883002	2D-disc	True	19.0073
644.722	0.222564	12.8842	151	1	0.662252	2D-disc	True	19.2143
520.729	0.136423	17.5221	151	1.33333	0.883002	2D-disc	True	19.831
397.896	0.100181	18.3584	151	0.666667	0.441501	2D-disc	True	19.968
407.679	0.285	6.66097	151	0.666667	0.441501	2D-disc	True	20.1163
532.751	0.321978	8.04827	151	0.666667	0.441501	2D-disc	True	21.013
404.018	0.022301	90.3018	151	1.33333	0.883002	2D-disc	True	21.533
423.429	0.088686	24.5579	151	0.333333	0.220751	2D-disc	True	22.2202
431.138	0.022318	99.4419	151	1.33333	0.883002	2D-disc	True	22.2378
494.504	0.07992	32.4386	151	0.666667	0.441501	2D-disc	True	22.6481
406.329	0.0525	40.8392	151	0.666667	0.441501	2D-disc	True	22.7952
416.822	0.069278	32.073	151	1	0.662252	2D-disc	True	23.0287
247.67	0.015203	87.2069	151	1.33333	0.883002	2D-disc	True	23.1254
501.338	0.326252	8.33438	151	1	0.662252	2D-disc	True	23.4304
501.014	0.042604	64.1605	151	1	0.662252	2D-disc	True	23.5696
336.998	0.123073	15.7295	151	1.33333	0.883002	2D-disc	True	24.8161
481.669	0.061134	46.4154	151	0.666667	0.441501	2D-disc	True	25.4495
301.982	0.036961	48.7162	151	1.33333	0.883002	2D-disc	True	25.7584
602.743	0.061701	58.3676	151	0.333333	0.220751	2D-disc	True	25.8117
358.231	0.048424	44.3909	151	1.33333	0.883002	2D-disc	True	25.9224
161.44	0.015687	62.6776	151	0.666667	0.441501	2D-disc	True	26.3102
276.286	0.047176	35.9468	151	1.33333	0.883002	2D-disc	True	26.5159
308.521	0.11672	16.49	151	1.33333	0.883002	2D-disc	True	26.9504
511.812	0.184998	17.3725	151	1.33333	0.883002	2D-disc	True	27.127
238.062	0.025913	58.8008	151	0	0	2D-disc	True	27.65
639.112	0.082278	51.127	151	1.33333	0.883002	2D-disc	True	28.4342
562.814	0.148452	25.2942	151	0.666667	0.441501	2D-disc	True	28.8221
637.184	0.159842	26.9679	151	1.33333	0.883002	2D-disc	True	29.2251
290.382	0.062011	31.771	151	1.33333	0.883002	2D-disc	True	29.3099
517.264	0.117173	30.2059	151	1.33333	0.883002	2D-disc	True	29.5591
313.724	0.076602	28.9146	151	1.33333	0.883002	2D-disc	True	30.4995
678.354	0.099547	50.0806	151	1.33333	0.883002	2D-disc	True	31.7487
432.164	0.251944	12.9501	151	1.33333	0.883002	2D-disc	True	32.6145
405.691	0.055465	59.1555	151	0	0	2D-disc	True	34.9383
447.599	0.141111	25.772	151	1.33333	0.883002	2D-disc	True	35.0997
325.693	0.027016	101.449	151	0.666667	0.441501	2D-disc	True	36.3536
578.332	0.107638	45.913	151	1	0.662252	2D-disc	True	36.9154
503.883	0.099499	43.5309	151	1.33333	0.883002	2D-disc	True	37.1339
636.325	0.064261	85.2182	151	1.33333	0.883002	2D-disc	True	37.1779
518.242	0.399683	11.1837	151	1.33333	0.883002	2D-disc	True	37.2608
327.649	0.057923	50.2565	151	0.666667	0.441501	2D-disc	True	38.3812
292.356	0.124753	21.2327	151	1.33333	0.883002	2D-disc	True	39.1406
318.751	0.058412	50.493	151	1	0.662252	2D-disc	True	39.9729
371.876	0.350599	9.92981	151	1.33333	0.883002	2D-disc	True	40.4424
402.077	0.079841	47.562	151	1.33333	0.883002	2D-disc	True	40.8001
436.921	0.033077	127.211	151	1	0.662252	2D-disc	True	41.6036
346.065	0.104651	31.8767	151	0.666667	0.441501	2D-disc	True	41.6431
294.107	0.080207	35.4736	151	1	0.662252	2D-disc	True	41.7922
422.862	0.28709	14.7803	151	0	0	2D-disc	True	43.3498
657.544	0.102411	64.4662	151	0.333333	0.220751	2D-disc	True	43.3749
339.781	0.148073	23.1633	151	0.333333	0.220751	2D-disc	True	43.6075
338.82	0.205926	16.6893	151	1	0.662252	2D-disc	True	43.8191
513.987	0.115187	45.2657	151	1.33333	0.883002	2D-disc	True	43.8233
352.882	0.137495	26.238	151	1.33333	0.883002	2D-disc	True	44.1643
390.711	0.177411	22.6899	151	1.33333	0.883002	2D-disc	True	44.5084
499.807	0.269194	19.2933	151	1.33333	0.883002	2D-disc	True	44.8904
395.76	0.124839	33.0806	151	1.33333	0.883002	2D-disc	True	45.0791
454.888	0.583928	8.79013	151	1	0.662252	2D-disc	True	48.7454
612.768	0.189391	37.107	151	1.33333	0.883002	2D-disc	True	49.5454
596.934	0.132878	51.7675	151	1.33333	0.883002	2D-disc	True	49.7815
633.006	0.989179	7.6409	151	1.33333	0.883002	2D-disc	True	51.5816
559.054	0.093277	73.2445	151	1	0.662252	2D-disc	True	52.7934
615.237	0.104179	73.1331	151	0.666667	0.441501	2D-disc	True	53.4978
536.694	0.314355	23.918	151	1	0.662252	2D-disc	True	60.5206
599.173	0.337711	26.013	151	1.33333	0.883002	2D-disc	True	63.3383
555.679	0.160891	50.8701	151	1	0.662252	2D-disc	True	63.6289
336.976	0.096503	53.9366	151	1	0.662252	2D-disc	True	66.7281
636.259	0.164901	59.7293	151	1.33333	0.883002	2D-disc	True	66.8746
567.687	0.792508	11.754	151	1.33333	0.883002	2D-disc	True	70.8864
371.1	0.211244	30.169	151	1.33333	0.883002	2D-disc	True	74.1889
385.919	0.123907	55.4642	151	0.333333	0.220751	2D-disc	True	76.9299
596.441	0.218943	49.8394	151	1.33333	0.883002	2D-disc	True	79.0352
551.404	0.225536	44.9772	151	1.33333	0.883002	2D-disc	True	79.4733
553.75	0.382025	26.7602	151	1.33333	0.883002	2D-disc	True	79.7538
453.466	0.799292	10.5544	151	1.33333	0.883002	2D-disc	True	80.367
409.067	0.271432	28.1336	151	0	0	2D-disc	True	80.6448
497.291	0.128706	90.6919	151	1	0.662252	2D-disc	True	101.401
214.301	0.027759	9.37158	1173	9.66667	0.824098	3D-spheroid	True	5.24417
171.281	0.02294	10.4436	1173	11	0.937766	3D-spheroid	True	6.04253
442.373	0.057924	12.023	1173	11	0.937766	3D-spheroid	True	6.80092
227.51	0.029272	14.277	1173	10.6667	0.909349	3D-spheroid	True	7.93548
206.094	0.039021	10.3233	1173	9.66667	0.824098	3D-spheroid	True	8.44378
389.662	0.036167	22.642	1173	11.6667	0.994601	3D-spheroid	True	9.07868
398.787	0.042982	22.4153	1173	9.33333	0.795681	3D-spheroid	True	10.437
487.188	0.035456	39.1141	1173	9.66667	0.824098	3D-spheroid	True	12.2973
402.486	0.082443	14.9873	1173	9.33333	0.795681	3D-spheroid	True	13.262
428.28	0.108982	17.3612	1173	11	0.937766	3D-spheroid	True	19.0849
408.092	0.04209	46.6572	1173	11	0.937766	3D-spheroid	True	20.7885
488.726	0.018524	5.06916	151	3601	2384.77	2D-disc	False	0.830021
764.568	0.016406	10.3509	151	3803.67	2518.98	2D-disc	False	0.959506
668.644	0.024822	6.19098	151	3341.67	2213.02	2D-disc	False	0.992853
739.672	0.03208	5.35752	151	2573.33	1704.19	2D-disc	False	1.00379
779.261	0.016557	11.1688	151	3586	2374.83	2D-disc	False	1.02515
384.422	0.019026	5.89045	151	4007.33	2653.86	2D-disc	False	1.25942
562.876	0.023296	7.09668	151	2933.33	1942.6	2D-disc	False	1.26884
798.966	0.05366	5.20274	151	77.6667	51.4349	2D-disc	False	1.50952
639.404	0.018979	12.4391	151	3350.33	2218.76	2D-disc	False	1.59504
523.685	0.032764	6.43191	151	1515.67	1003.75	2D-disc	False	1.7384
625.493	0.015125	16.713	151	3488.33	2310.15	2D-disc	False	1.74587
707.023	0.026144	11.3188	151	1995	1321.19	2D-disc	False	1.80809
763.286	0.033184	9.98408	151	382.667	253.422	2D-disc	False	1.87514
511.085	0.023394	10.0165	151	2766.67	1832.23	2D-disc	False	1.98066
455.747	0.041516	5.17686	151	49.3333	32.6711	2D-disc	False	2.03724
617.492	0.061712	5.27899	151	6	3.97351	2D-disc	False	2.27915
778.332	0.045942	9.14026	151	63.6667	42.1634	2D-disc	False	2.33071
719.348	0.031018	12.7714	151	399.667	264.68	2D-disc	False	2.37902
667.197	0.021812	17.0553	151	2078.67	1376.6	2D-disc	False	2.40872
530.84	0.024575	12.5123	151	1971.67	1305.74	2D-disc	False	2.50238
672.902	0.023233	17.7761	151	1271.67	842.163	2D-disc	False	2.65139
401.582	0.023174	10.9631	151	2439	1615.23	2D-disc	False	2.73302
624.973	0.048738	8.24895	151	15	9.93378	2D-disc	False	2.779
479.631	0.015596	20.6708	151	3064.67	2029.58	2D-disc	False	2.90366
567.089	0.046998	8.15546	151	16	10.596	2D-disc	False	2.91985
693.034	0.052133	9.03638	151	28.6667	18.9845	2D-disc	False	2.93654
378.795	0.036796	7.64388	151	19	12.5828	2D-disc	False	3.2077
238.702	0.028134	6.39367	151	2163.67	1432.89	2D-disc	False	3.25544
712.103	0.023485	23.5653	151	475.667	315.011	2D-disc	False	3.35742
657.448	0.022528	22.7318	151	798.667	528.918	2D-disc	False	3.36494
767.557	0.024598	24.429	151	173.667	115.011	2D-disc	False	3.38204
795.423	0.016815	37.2593	151	2386.67	1580.57	2D-disc	False	3.40265
395.824	0.021519	14.6367	151	2341.33	1550.55	2D-disc	False	3.43753
743.699	0.057286	10.6935	151	9.66667	6.40177	2D-disc	False	3.5584
504.493	0.044278	9.4211	151	16.6667	11.0375	2D-disc	False	3.57206
216.714	0.025522	7.10824	151	2358.67	1562.03	2D-disc	False	3.61638
335.084	0.033461	8.69002	151	37	24.5033	2D-disc	False	3.74878
346.236	0.020351	15.2337	151	2586.33	1712.8	2D-disc	False	3.86815
795.642	0.045065	16.5791	151	25	16.5563	2D-disc	False	4.05665
618.399	0.028176	21.217	151	40.6667	26.9316	2D-disc	False	4.17617
719.789	0.033134	21.3245	151	17.6667	11.6998	2D-disc	False	4.24063
264.5	0.03451	7.86022	151	9.66667	6.40177	2D-disc	False	4.43035
683.345	0.024532	28.5933	151	65.3333	43.2671	2D-disc	False	4.43446
500.934	0.027793	18.7031	151	43	28.4768	2D-disc	False	4.48282
770.943	0.132555	6.18839	151	6.66667	4.41501	2D-disc	False	4.59659
596.317	0.020383	31.5568	151	221	146.358	2D-disc	False	4.6598
590.764	0.018551	34.797	151	890	589.404	2D-disc	False	4.7204
517.88	0.066134	8.61725	151	10	6.62252	2D-disc	False	4.75387
560.9	0.016925	38.0065	151	1418.67	939.514	2D-disc	False	4.95433
438.708	0.03605	14.108	151	6.33333	4.19426	2D-disc	False	5.00818
559.34	0.10245	6.37965	151	3	1.98676	2D-disc	False	5.04797
227.4	0.020499	13.5805	151	2368.67	1568.65	2D-disc	False	5.28864
510.913	0.102473	6.13418	151	6	3.97351	2D-disc	False	5.31499
774.707	0.060193	15.9267	151	16	10.596	2D-disc	False	5.34586
689.261	0.1102	7.95416	151	4.66667	3.09051	2D-disc	False	5.49384
764.188	0.057068	17.142	151	13	8.60927	2D-disc	False	5.53015
296.836	0.021558	17.643	151	1499.33	992.936	2D-disc	False	5.53538
760.334	0.017151	56.9211	151	189.333	125.386	2D-disc	False	5.54679
575.318	0.058286	12.8576	151	7.66667	5.07726	2D-disc	False	5.6273
783.308	0.024075	42.4951	151	62.3333	41.2804	2D-disc	False	5.6423
523.97	0.030713	22.4589	151	19.6667	13.0243	2D-disc	False	5.68706
674.511	0.062925	14.2629	151	6.33333	4.19426	2D-disc	False	5.74813
383.905	0.059545	8.6286	151	3.66667	2.42826	2D-disc	False	5.78156
318.679	0.032577	13.2861	151	6.66667	4.41501	2D-disc	False	5.8673
391.268	0.029279	18.3152	151	12.3333	8.16777	2D-disc	False	5.92077
645.726	0.020703	43.1697	151	49.6667	32.8918	2D-disc	False	5.97927
618.954	0.042825	20.4029	151	8	5.29801	2D-disc	False	6.09838
514.727	0.041889	17.6924	151	5	3.31126	2D-disc	False	6.22006
376.917	0.049493	11.0066	151	1.66667	1.10375	2D-disc	False	6.24358
282.174	0.023599	17.3887	151	70.6667	46.7991	2D-disc	False	6.28242
551.223	0.0657	12.4018	151	5.66667	3.75276	2D-disc	False	6.38567
641.057	0.057325	16.5618	151	2	1.3245	2D-disc	False	6.3979
627.745	0.022999	41.1587	151	14.6667	9.71302	2D-disc	False	6.51435
419.4	0.05825	10.8673	151	1.66667	1.10375	2D-disc	False	6.52041
414.617	0.0248	25.7135	151	34.3333	22.7373	2D-disc	False	6.6443
681.747	0.038113	28.1276	151	10	6.62252	2D-disc	False	6.79308
240.04	0.016991	22.2988	151	2573.33	1704.19	2D-disc	False	6.81868
507.374	0.017164	46.7656	151	372.333	246.578	2D-disc	False	6.8344
745.878	0.02061	58.4847	151	33	21.8543	2D-disc	False	6.9813
604.111	0.08612	11.5048	151	4.66667	3.09051	2D-disc	False	7.08518
604.523	0.02558	38.916	151	11.6667	7.72627	2D-disc	False	7.11378
794.11	0.083345	15.8601	151	21.3333	14.128	2D-disc	False	7.19101
506.537	0.072663	11.7628	151	4.33333	2.86976	2D-disc	False	7.2895
761.818	0.020008	64.7294	151	61.3333	40.6181	2D-disc	False	7.34408
488.114	0.034122	24.5363	151	2.33333	1.54525	2D-disc	False	7.40979
720.514	0.181693	6.94382	151	5	3.31126	2D-disc	False	7.56446
262.796	0.031451	14.9034	151	3.66667	2.42826	2D-disc	False	7.7052
731.715	0.070653	18.8246	151	9	5.96026	2D-disc	False	7.85234
728.236	0.050812	26.2721	151	6.33333	4.19426	2D-disc	False	7.91905
645.422	0.045561	26.0368	151	2	1.3245	2D-disc	False	7.94001
688.261	0.129415	9.78852	151	9.33333	6.18102	2D-disc	False	7.95119
510.478	0.031228	30.4624	151	4.33333	2.86976	2D-disc	False	8.05035
721.712	0.190349	7.07314	151	6	3.97351	2D-disc	False	8.05904
744.029	0.194966	7.33005	151	7.33333	4.85651	2D-disc	False	8.29773
382.677	0.056644	13.3262	151	4	2.64901	2D-disc	False	8.52138
617.904	0.041548	29.4388	151	2.66667	1.766	2D-disc	False	8.55131
701.291	0.025919	54.1696	151	9.66667	6.40177	2D-disc	False	8.64887
758.769	0.104832	14.5487	151	9.66667	6.40177	2D-disc	False	8.68343
501.968	0.064634	15.9273	151	2	1.3245	2D-disc	False	8.85954
716.667	0.108878	13.4999	151	9.33333	6.18102	2D-disc	False	8.86005
472.653	0.034411	28.2651	151	2	1.3245	2D-disc	False	8.88974
712.285	0.034833	42.5897	151	5.66667	3.75276	2D-disc	False	8.99756
615.608	0.018014	71.8426	151	17.3333	11.479	2D-disc	False	9.08179
767.639	0.015099	107.222	151	183.667	121.634	2D-disc	False	9.11085
686.638	0.064343	22.5601	151	4	2.64901	2D-disc	False	9.13267
635.896	0.238529	5.67729	151	4.66667	3.09051	2D-disc	False	9.19982
731.395	0.295585	5.31084	151	4.66667	3.09051	2D-disc	False	9.27208
382.275	0.043815	18.8208	151	1.66667	1.10375	2D-disc	False	9.319
449.225	0.020809	46.6545	151	6.66667	4.41501	2D-disc	False	9.33609
778.26	0.260392	6.46213	151	9.66667	6.40177	2D-disc	False	9.34033
387.225	0.032767	25.8156	151	6	3.97351	2D-disc	False	9.43713
681.402	0.02492	59.9258	151	9.33333	6.18102	2D-disc	False	9.46764
476.401	0.118971	8.81441	151	3.33333	2.20751	2D-disc	False	9.50923
437.256	0.019315	49.8976	151	4.33333	2.86976	2D-disc	False	9.52186
432.409	0.017654	54.0935	151	19.3333	12.8035	2D-disc	False	9.54064
724.556	0.017838	90.1611	151	25.6667	16.9978	2D-disc	False	9.58908
573.002	0.222212	5.73441	151	6	3.97351	2D-disc	False	9.60691
670.353	0.019719	76.6617	151	21.6667	14.3488	2D-disc	False	9.7419
701.032	0.020342	77.8468	151	23.3333	15.4525	2D-disc	False	9.75844
534.108	0.059273	20.6806	151	4	2.64901	2D-disc	False	9.91458
265.755	0.077678	7.85631	151	1.66667	1.10375	2D-disc	False	9.92017
345.647	0.024832	32.0526	151	1.66667	1.10375	2D-disc	False	9.94777
717.264	0.295704	5.61984	151	8.66667	5.73951	2D-disc	False	10.0089
649.208	0.170867	8.8269	151	9	5.96026	2D-disc	False	10.0361
637.442	0.296514	5.0359	151	2.66667	1.766	2D-disc	False	10.1196
200.701	0.060383	7.81714	151	1.66667	1.10375	2D-disc	False	10.1601
348.327	0.021717	38.0732	151	3	1.98676	2D-disc	False	10.2545
359.116	0.019375	44.0247	151	4.33333	2.86976	2D-disc	False	10.261
795.659	0.069831	27.0919	151	9.33333	6.18102	2D-disc	False	10.2717
680.049	0.17175	9.44605	151	2	1.3245	2D-disc	False	10.306
779.099	0.016671	111.824	151	72.6667	48.1236	2D-disc	False	10.3368
652.835	0.03512	44.9321	151	8	5.29801	2D-disc	False	10.4422
566.681	0.028132	48.8289	151	6	3.97351	2D-disc	False	10.4718
798.378	0.369318	5.25826	151	11.6667	7.72627	2D-disc	False	10.5079
544.868	0.050088	26.5769	151	4.66667	3.09051	2D-disc	False	10.5543
739.175	0.045905	39.5631	151	6	3.97351	2D-disc	False	10.6142
744.835	0.044011	42.0464	151	5.33333	3.53201	2D-disc	False	10.7328
659.334	0.304786	5.3752	151	5	3.31126	2D-disc	False	10.7342
609.163	0.028821	52.657	151	8	5.29801	2D-disc	False	10.7626
519.096	0.059513	21.8292	151	2.33333	1.54525	2D-disc	False	10.8115
619.294	0.23907	6.48439	151	4.33333	2.86976	2D-disc	False	10.8139
745.548	0.181468	10.3409	151	7.66667	5.07726	2D-disc	False	10.8734
702.672	0.015978	111.05	151	35.6667	23.6203	2D-disc	False	10.9087
551.901	0.025416	54.9978	151	3.66667	2.42826	2D-disc	False	10.9415
364.463	0.057832	16.1609	151	1.66667	1.10375	2D-disc	False	11.0781
751.65	0.191917	10.0504	151	2.66667	1.766	2D-disc	False	11.0858
365.042	0.017144	54.9224	151	11	7.28477	2D-disc	False	11.143
348.052	0.022428	40.1426	151	2.33333	1.54525	2D-disc	False	11.1747
710.561	0.353999	5.19844	151	7.33333	4.85651	2D-disc	False	11.1881
663.314	0.144346	11.9682	151	8.66667	5.73951	2D-disc	False	11.2512
728.69	0.030891	61.5147	151	6	3.97351	2D-disc	False	11.2655
550.871	0.208704	6.89346	151	3	1.98676	2D-disc	False	11.2824
426.326	0.042978	26.0104	151	4.33333	2.86976	2D-disc	False	11.3275
782.976	0.338674	6.13883	151	12	7.94702	2D-disc	False	11.471
682.885	0.037251	48.7166	151	7	4.63576	2D-disc	False	11.4802
789.79	0.074473	28.2891	151	6.33333	4.19426	2D-disc	False	11.5237
541.123	0.027632	52.728	151	6.66667	4.41501	2D-disc	False	11.6316
655.499	0.126179	14.0073	151	5.33333	3.53201	2D-disc	False	11.6481
349.936	0.019743	47.9253	151	10	6.62252	2D-disc	False	11.6808
771.33	0.162865	12.8503	151	24	15.894	2D-disc	False	11.7215
335.895	0.017888	51.0258	151	7.66667	5.07726	2D-disc	False	11.739
754.417	0.051801	39.6268	151	2	1.3245	2D-disc	False	11.7544
705.539	0.016341	117.585	151	35.3333	23.3996	2D-disc	False	11.7651
449.368	0.040906	30.1967	151	2	1.3245	2D-disc	False	11.8748
583.029	0.130525	12.2923	151	3.66667	2.42826	2D-disc	False	11.8883
785.297	0.163731	13.2834	151	14.6667	9.71302	2D-disc	False	11.9644
474.921	0.196824	6.6963	151	7.66667	5.07726	2D-disc	False	11.9888
483.58	0.044298	30.3656	151	2.66667	1.766	2D-disc	False	12.0166
530.348	0.242919	6.12643	151	2.66667	1.766	2D-disc	False	12.1225
170.212	0.015467	30.8881	151	2260.67	1497.13	2D-disc	False	12.1253
532.442	0.025474	59.4034	151	2	1.3245	2D-disc	False	12.2778
480.325	0.182493	7.58435	151	2.66667	1.766	2D-disc	False	12.4484
656.496	0.081427	23.3858	151	15.6667	10.3753	2D-disc	False	12.5306
327.973	0.019293	49.5115	151	4.66667	3.09051	2D-disc	False	12.582
767.661	0.19689	11.3914	151	23.3333	15.4525	2D-disc	False	12.6216
660.087	0.082782	23.5112	151	6.33333	4.19426	2D-disc	False	12.7377
588.427	0.116024	15.0391	151	7.33333	4.85651	2D-disc	False	12.8103
335.668	0.021324	46.679	151	2.33333	1.54525	2D-disc	False	12.8105
763.394	0.072448	31.3334	151	12.6667	8.38852	2D-disc	False	12.846
370.084	0.184465	5.9815	151	1.66667	1.10375	2D-disc	False	12.8797
609.527	0.016731	110.196	151	16.3333	10.8168	2D-disc	False	13.0671
459.36	0.07795	17.8939	151	6	3.97351	2D-disc	False	13.1175
550.955	0.063287	26.4911	151	2.33333	1.54525	2D-disc	False	13.1456
459.344	0.123262	11.3547	151	4	2.64901	2D-disc	False	13.1628
776.697	0.20067	11.8144	151	14.3333	9.49227	2D-disc	False	13.1864
515.428	0.145896	10.7872	151	2	1.3245	2D-disc	False	13.1907
254.666	0.015392	50.5242	151	1483.67	982.561	2D-disc	False	13.1919
426.051	0.108706	11.989	151	2.33333	1.54525	2D-disc	False	13.2147
785.226	0.03501	69.0636	151	18.6667	12.362	2D-disc	False	13.3024
582.682	0.187121	9.63219	151	5.33333	3.53201	2D-disc	False	13.3629
348.23	0.176239	6.11752	151	3.66667	2.42826	2D-disc	False	13.375
651.575	0.020278	100.192	151	19	12.5828	2D-disc	False	13.4703
731.39	0.062672	36.8606	151	4.66667	3.09051	2D-disc	False	13.6449
306.023	0.076887	12.6155	151	3.33333	2.20751	2D-disc	False	13.6926
334.759	0.02087	50.9372	151	7	4.63576	2D-disc	False	13.7186
577.734	0.088538	20.866	151	10	6.62252	2D-disc	False	13.8142
650.234	0.106461	19.5537	151	6	3.97351	2D-disc	False	13.8303
638.77	0.02162	95.4061	151	3.33333	2.20751	2D-disc	False	13.9499
663.995	0.028669	74.9346	151	5	3.31126	2D-disc	False	13.977
520.753	0.087046	19.4983	151	4.66667	3.09051	2D-disc	False	14.0798
592.719	0.088489	21.8815	151	4.33333	2.86976	2D-disc	False	14.1124
314.446	0.020051	51.5845	151	3.66667	2.42826	2D-disc	False	14.21
539	0.016853	105.554	151	16	10.596	2D-disc	False	14.2577
550.232	0.262496	6.93693	151	3.33333	2.20751	2D-disc	False	14.2964
287.798	0.025956	36.753	151	2.66667	1.766	2D-disc	False	14.3195
283.573	0.11222	8.38287	151	2	1.3245	2D-disc	False	14.3312
229.371	0.149024	5.14346	151	5	3.31126	2D-disc	False	14.4363
778.673	0.254197	10.3001	151	10.6667	7.06402	2D-disc	False	14.5258
512.034	0.093167	18.635	151	1.66667	1.10375	2D-disc	False	14.6479
356.661	0.151692	7.97315	151	2	1.3245	2D-disc	False	14.6494
618.219	0.042233	50.4359	151	1.66667	1.10375	2D-disc	False	14.8845
511.648	0.074094	23.9742	151	2.66667	1.766	2D-disc	False	14.9982
781.24	0.389196	6.96992	151	14.3333	9.49227	2D-disc	False	15.0001
679.421	0.075776	31.2299	151	5.33333	3.53201	2D-disc	False	15.0469
185.376	0.08201	7.89247	151	1.66667	1.10375	2D-disc	False	15.0837
314.917	0.140251	7.85674	151	2	1.3245	2D-disc	False	15.116
794.622	0.303727	9.34078	151	12.3333	8.16777	2D-disc	False	15.4237
562.094	0.063065	31.8227	151	3	1.98676	2D-disc	False	15.4241
618.969	0.278187	7.96645	151	6.33333	4.19426	2D-disc	False	15.4674
459.231	0.224144	7.33735	151	6	3.97351	2D-disc	False	15.471
528.825	0.317342	5.97121	151	3	1.98676	2D-disc	False	15.4797
741.829	0.027693	96.2846	151	6.66667	4.41501	2D-disc	False	15.5277
633.447	0.076814	29.7443	151	8.66667	5.73951	2D-disc	False	15.5818
220.685	0.158571	5.05054	151	4.33333	2.86976	2D-disc	False	15.6773
438.967	0.032434	49.1192	151	2	1.3245	2D-disc	False	15.6785
644.335	0.091923	25.6299	151	2.33333	1.54525	2D-disc	False	15.7959
458.802	0.022759	74.0104	151	3.66667	2.42826	2D-disc	False	15.86
200.043	0.022589	32.5684	151	1.66667	1.10375	2D-disc	False	15.8875
672.134	0.227002	10.8988	151	6	3.97351	2D-disc	False	15.9015
640.167	0.031516	74.8326	151	7	4.63576	2D-disc	False	15.9152
220.551	0.016358	49.798	151	11.3333	7.50552	2D-disc	False	15.9557
668.969	0.160174	15.4548	151	13.3333	8.83002	2D-disc	False	15.9858
382.66	0.252716	5.607	151	4.66667	3.09051	2D-disc	False	15.9968
512.758	0.293054	6.5128	151	5.33333	3.53201	2D-disc	False	16.08
771.364	0.038883	74.2513	151	14.6667	9.71302	2D-disc	False	16.1692
681.121	0.03601	71.1701	151	4.33333	2.86976	2D-disc	False	16.2547
701.616	0.272876	9.72269	151	8.66667	5.73951	2D-disc	False	16.3357
670.474	0.050888	49.9148	151	9	5.96026	2D-disc	False	16.3661
698.055	0.345946	7.64759	151	3.66667	2.42826	2D-disc	False	16.373
431.552	0.01561	105.069	151	16	10.596	2D-disc	False	16.4184
428.848	0.061717	26.7685	151	2.66667	1.766	2D-disc	False	16.6422
328.324	0.142487	8.89543	151	2.66667	1.766	2D-disc	False	16.6772
778.489	0.041326	73.0751	151	10.3333	6.84327	2D-disc	False	16.7581
417.821	0.051075	31.8902	151	4.33333	2.86976	2D-disc	False	16.8406
711.394	0.030852	91.2622	151	5.66667	3.75276	2D-disc	False	17.0981
611.711	0.019563	124.72	151	8.33333	5.51876	2D-disc	False	17.231
766.379	0.435425	7.02939	151	16.6667	11.0375	2D-disc	False	17.2533
730.468	0.169093	17.2767	151	7.66667	5.07726	2D-disc	False	17.277
597.73	0.032696	73.4393	151	4.33333	2.86976	2D-disc	False	17.3541
677.086	0.073291	37.1721	151	10	6.62252	2D-disc	False	17.3823
788.571	0.027688	114.726	151	14.6667	9.71302	2D-disc	False	17.4018
515.901	0.086284	24.2392	151	1.66667	1.10375	2D-disc	False	17.5132
624.193	0.030079	84.4077	151	4.33333	2.86976	2D-disc	False	17.5716
725.788	0.168192	17.6394	151	3	1.98676	2D-disc	False	17.6589
676.927	0.162911	16.9911	151	8.33333	5.51876	2D-disc	False	17.665
495.096	0.023892	85.1014	151	2	1.3245	2D-disc	False	17.7412
570.507	0.312385	7.50632	151	4.66667	3.09051	2D-disc	False	17.7558
464.355	0.040884	46.779	151	2.33333	1.54525	2D-disc	False	17.7925
734.488	0.180407	16.772	151	10.3333	6.84327	2D-disc	False	17.7966
783.964	0.202246	16.0624	151	24.3333	16.1148	2D-disc	False	17.9011
499.369	0.233027	8.89404	151	3	1.98676	2D-disc	False	17.9295
459.98	0.098	19.5414	151	1.66667	1.10375	2D-disc	False	17.9856
651.551	0.162764	16.684	151	5	3.31126	2D-disc	False	18.005
684.622	0.279662	10.258	151	5.33333	3.53201	2D-disc	False	18.1021
754.184	0.518641	6.1341	151	12	7.94702	2D-disc	False	18.2232
246.911	0.202675	5.16932	151	4.66667	3.09051	2D-disc	False	18.3306
545.738	0.046766	49.5969	151	3.33333	2.20751	2D-disc	False	18.3605
722.708	0.18882	16.3072	151	6.66667	4.41501	2D-disc	False	18.4055
569.981	0.207133	11.7404	151	6.33333	4.19426	2D-disc	False	18.4313
779.326	0.089533	37.2055	151	9.33333	6.18102	2D-disc	False	18.4652
717.597	0.351744	8.76305	151	8.33333	5.51876	2D-disc	False	18.556
529.052	0.162462	14.024	151	3	1.98676	2D-disc	False	18.6041
673.118	0.392562	7.3903	151	9	5.96026	2D-disc	False	18.6193
690.181	0.145894	20.4191	151	8.33333	5.51876	2D-disc	False	18.6464
797.716	0.022107	155.771	151	11.6667	7.72627	2D-disc	False	18.6488
704.429	0.153146	19.9504	151	7	4.63576	2D-disc	False	18.7372
422.182	0.017663	103.712	151	8.33333	5.51876	2D-disc	False	18.7446
521.663	0.016548	137.243	151	9.66667	6.40177	2D-disc	False	18.8074
751.587	0.064185	51.0319	151	11.6667	7.72627	2D-disc	False	18.827
471.802	0.053802	38.2196	151	3	1.98676	2D-disc	False	18.8282
729.203	0.500207	6.35706	151	5.33333	3.53201	2D-disc	False	18.8383
676.145	0.032312	91.2691	151	12	7.94702	2D-disc	False	18.8422
465.948	0.027789	73.5483	151	2	1.3245	2D-disc	False	18.9492
700.88	0.028347	108.576	151	10	6.62252	2D-disc	False	18.9706
685.225	0.029672	101.563	151	2	1.3245	2D-disc	False	18.9991
698.854	0.024703	125.091	151	5.66667	3.75276	2D-disc	False	19.1017
690.242	0.062392	49.0617	151	4.66667	3.09051	2D-disc	False	19.1582
553.007	0.18191	13.4906	151	7.33333	4.85651	2D-disc	False	19.1708
570.064	0.021892	115.583	151	6.33333	4.19426	2D-disc	False	19.1752
703.928	0.152085	20.5636	151	5	3.31126	2D-disc	False	19.1929
706.501	0.422185	7.44475	151	6.66667	4.41501	2D-disc	False	19.2187
649.294	0.021997	131.488	151	6.33333	4.19426	2D-disc	False	19.2438
594.865	0.06672	39.8149	151	4.33333	2.86976	2D-disc	False	19.2915
756.365	0.107265	31.5419	151	12.6667	8.38852	2D-disc	False	19.324
505.019	0.155967	14.5283	151	4.33333	2.86976	2D-disc	False	19.3831
788.384	0.308581	11.4644	151	19.3333	12.8035	2D-disc	False	19.385
663.621	0.447816	6.68083	151	5.33333	3.53201	2D-disc	False	19.4757
758.983	0.560401	6.1125	151	7	4.63576	2D-disc	False	19.4971
481.472	0.036688	59.4875	151	6.66667	4.41501	2D-disc	False	19.5822
209.651	0.017575	54.0739	151	1.66667	1.10375	2D-disc	False	19.5825
332.386	0.281795	5.35238	151	3.66667	2.42826	2D-disc	False	19.603
665.778	0.030525	99.0422	151	8	5.29801	2D-disc	False	19.6169
689.005	0.107067	29.2532	151	10.6667	7.06402	2D-disc	False	19.6377
582.571	0.017208	154.712	151	12	7.94702	2D-disc	False	19.742
768.547	0.139917	25.1282	151	16	10.596	2D-disc	False	19.7627
597.629	0.03034	90.1614	151	3	1.98676	2D-disc	False	19.7737
759.135	0.029138	119.355	151	9	5.96026	2D-disc	False	19.7908
430.931	0.033808	58.3983	151	4	2.64901	2D-disc	False	19.7923
542.777	0.083949	29.6289	151	5.33333	3.53201	2D-disc	False	19.7967
762.205	0.579906	6.02512	151	9	5.96026	2D-disc	False	19.8032
546.507	0.383467	6.53683	151	2	1.3245	2D-disc	False	19.8145
586.252	0.019591	137.414	151	9.66667	6.40177	2D-disc	False	19.8374
599.007	0.030397	90.6842	151	4.66667	3.09051	2D-disc	False	19.8799
717.284	0.035624	92.9451	151	12	7.94702	2D-disc	False	19.9417
697.174	0.219658	14.6687	151	5	3.31126	2D-disc	False	19.9656
538.514	0.342079	7.27961	151	5.33333	3.53201	2D-disc	False	19.9766
696.851	0.296667	11.0034	151	5.66667	3.75276	2D-disc	False	20.2368
748.547	0.046965	74.8051	151	9	5.96026	2D-disc	False	20.2755
485.793	0.054912	41.7878	151	4	2.64901	2D-disc	False	20.4056
327.465	0.016736	92.6227	151	5	3.31126	2D-disc	False	20.4498
773.496	0.671835	5.46712	151	20	13.245	2D-disc	False	20.5138
747.848	0.042768	83.3121	151	8.66667	5.73951	2D-disc	False	20.5825
709.787	0.611814	5.53378	151	10	6.62252	2D-disc	False	20.6062
469.375	0.436025	5.15377	151	2.66667	1.766	2D-disc	False	20.6824
625.26	0.431866	6.94033	151	4.33333	2.86976	2D-disc	False	20.7087
759.032	0.276437	13.1911	151	14.3333	9.49227	2D-disc	False	20.754
647.063	0.090329	34.4696	151	7	4.63576	2D-disc	False	20.7874
722.892	0.073683	47.4923	151	5.66667	3.75276	2D-disc	False	20.9123
776.953	0.033647	111.911	151	12.6667	8.38852	2D-disc	False	20.9366
230.125	0.068426	16.3166	151	2.33333	1.54525	2D-disc	False	20.9589
712.956	0.384353	9.00995	151	4	2.64901	2D-disc	False	20.9833
675.803	0.286291	11.4817	151	12.6667	8.38852	2D-disc	False	21.0125
372.939	0.332287	5.46145	151	3.33333	2.20751	2D-disc	False	21.0217
269.125	0.047529	27.5669	151	2.66667	1.766	2D-disc	False	21.0317
597.637	0.022361	130.216	151	2	1.3245	2D-disc	False	21.0476
720.663	0.149339	23.5694	151	5	3.31126	2D-disc	False	21.0996
718.822	0.127408	27.5562	151	9	5.96026	2D-disc	False	21.0998
565.334	0.018723	147.676	151	5.33333	3.53201	2D-disc	False	21.1283
256.1	0.19233	6.52274	151	6.33333	4.19426	2D-disc	False	21.1617
486.631	0.235878	10.1279	151	4.33333	2.86976	2D-disc	False	21.2077
666.813	0.175462	18.6597	151	14.3333	9.49227	2D-disc	False	21.2113
705.81	0.036658	94.6004	151	7.33333	4.85651	2D-disc	False	21.2255
758.211	0.247018	15.0894	151	16.6667	11.0375	2D-disc	False	21.2371
788.477	0.121865	31.8113	151	11.3333	7.50552	2D-disc	False	21.24
338.101	0.097601	17.055	151	1.66667	1.10375	2D-disc	False	21.2687
750.766	0.086997	42.5102	151	4.66667	3.09051	2D-disc	False	21.2802
567.559	0.021188	132.08	151	3	1.98676	2D-disc	False	21.301
760.339	0.066865	56.4006	151	7	4.63576	2D-disc	False	21.4269
225.024	0.15029	7.42911	151	6.66667	4.41501	2D-disc	False	21.4349
629.016	0.240317	12.9887	151	2	1.3245	2D-disc	False	21.4374
652.136	0.103824	31.2316	151	4	2.64901	2D-disc	False	21.4801
525.678	0.068297	38.2963	151	2	1.3245	2D-disc	False	21.4942
220.904	0.137189	8.01324	151	4.33333	2.86976	2D-disc	False	21.4985
625.919	0.074747	41.6869	151	4.66667	3.09051	2D-disc	False	21.5059
565.255	0.51109	5.50904	151	1.66667	1.10375	2D-disc	False	21.5185
712.213	0.030586	116.589	151	5.66667	3.75276	2D-disc	False	21.6298
491.9	0.238808	10.3216	151	4.33333	2.86976	2D-disc	False	21.6473
455.936	0.144275	15.8528	151	4.33333	2.86976	2D-disc	False	21.6708
709.15	0.043752	81.4938	151	11	7.28477	2D-disc	False	21.7204
289.293	0.060988	23.9683	151	2	1.3245	2D-disc	False	21.8287
735.064	0.047019	79.2891	151	2.33333	1.54525	2D-disc	False	21.9102
369.306	0.085746	21.8734	151	3.33333	2.20751	2D-disc	False	21.9395
569.541	0.107491	26.9125	151	4	2.64901	2D-disc	False	21.9424
647.279	0.126356	26.0214	151	4	2.64901	2D-disc	False	21.9442
400.866	0.099257	20.5824	151	1.66667	1.10375	2D-disc	False	22.0162
359.329	0.15465	11.86	151	6	3.97351	2D-disc	False	22.0508
693.899	0.08139	43.8208	151	3.66667	2.42826	2D-disc	False	22.2044
616.33	0.060307	52.6027	151	3.66667	2.42826	2D-disc	False	22.2355
439.53	0.25304	8.96586	151	3.33333	2.20751	2D-disc	False	22.2985
643.299	0.259617	12.8389	151	5.33333	3.53201	2D-disc	False	22.3837
707.589	0.072013	50.9358	151	9.33333	6.18102	2D-disc	False	22.3943
569.265	0.437622	6.74423	151	5.66667	3.75276	2D-disc	False	22.3976
579.403	0.254849	11.8346	151	4.33333	2.86976	2D-disc	False	22.4875
792.072	0.516504	7.99819	151	20	13.245	2D-disc	False	22.5312
331.56	0.333888	5.18817	151	2	1.3245	2D-disc	False	22.5703
390.792	0.199065	10.2805	151	3.66667	2.42826	2D-disc	False	22.6228
283.015	0.0182	81.5479	151	2.66667	1.766	2D-disc	False	22.6547
360.515	0.041803	45.3385	151	2	1.3245	2D-disc	False	22.7109
778.669	0.071932	56.9563	151	17	11.2583	2D-disc	False	22.7297
693.469	0.159904	22.9157	151	5.66667	3.75276	2D-disc	False	22.827
583.884	0.022314	138.356	151	5	3.31126	2D-disc	False	22.8419
750.626	0.468133	8.49693	151	4	2.64901	2D-disc	False	22.8924
713.57	0.206119	18.3509	151	8.66667	5.73951	2D-disc	False	22.8993
716.58	0.034706	110.068	151	8	5.29801	2D-disc	False	23.0295
665.407	0.026193	135.973	151	11.6667	7.72627	2D-disc	False	23.1224
758.697	0.043961	92.6663	151	16	10.596	2D-disc	False	23.1956
616.951	0.151517	21.9178	151	8.66667	5.73951	2D-disc	False	23.2537
728.104	0.285169	13.7447	151	4.66667	3.09051	2D-disc	False	23.2557
799.954	0.595547	7.24823	151	18	11.9205	2D-disc	False	23.3113
763.741	0.04208	99.0063	151	8	5.29801	2D-disc	False	23.5655
619.19	0.025128	134.694	151	6	3.97351	2D-disc	False	23.6138
740.497	0.067456	60.0251	151	6.66667	4.41501	2D-disc	False	23.6218
605.557	0.029476	112.597	151	3.33333	2.20751	2D-disc	False	23.6769
748.924	0.027125	151.351	151	10.6667	7.06402	2D-disc	False	23.6811
753.398	0.397272	10.4308	151	4.66667	3.09051	2D-disc	False	23.761
647.622	0.048618	73.2743	151	7.33333	4.85651	2D-disc	False	23.7635
453.515	0.037017	67.5712	151	5	3.31126	2D-disc	False	23.8262
382.707	0.210924	10.0154	151	3	1.98676	2D-disc	False	23.8458
233.545	0.018157	71.1194	151	9	5.96026	2D-disc	False	23.8861
394.959	0.024166	91.8578	151	5	3.31126	2D-disc	False	24.2802
427.319	0.054536	44.1005	151	4	2.64901	2D-disc	False	24.3142
425.803	0.350969	6.8609	151	1.66667	1.10375	2D-disc	False	24.4301
689.751	0.051993	75.1419	151	3	1.98676	2D-disc	False	24.4691
464.793	0.208065	12.6759	151	3	1.98676	2D-disc	False	24.5133
780.753	0.154086	28.7588	151	11	7.28477	2D-disc	False	24.5191
518.915	0.304253	9.6863	151	5.33333	3.53201	2D-disc	False	24.5347
645.715	0.677815	5.41039	151	6	3.97351	2D-disc	False	24.5348
711.956	0.053419	75.7472	151	5.33333	3.53201	2D-disc	False	24.5524
710.905	0.793603	5.10039	151	5.66667	3.75276	2D-disc	False	24.5968
440.585	0.022707	110.57	151	4	2.64901	2D-disc	False	24.6179
447.16	0.058058	43.9806	151	3.33333	2.20751	2D-disc	False	24.6686
619.856	0.272919	12.9977	151	3.66667	2.42826	2D-disc	False	24.7226
727.283	0.027634	150.731	151	3.33333	2.20751	2D-disc	False	24.7416
671.856	0.060673	63.4537	151	9.66667	6.40177	2D-disc	False	24.7548
300.987	0.180219	9.58862	151	1.66667	1.10375	2D-disc	False	24.8023
273.514	0.15213	10.3223	151	3	1.98676	2D-disc	False	24.8024
797.628	0.041289	111.042	151	10.6667	7.06402	2D-disc	False	24.8316
791.127	0.062767	72.6756	151	13	8.60927	2D-disc	False	24.9091
393.336	0.060048	37.7924	151	4.66667	3.09051	2D-disc	False	24.9243
503.316	0.105794	27.4722	151	2.33333	1.54525	2D-disc	False	24.9458
515.909	0.209972	14.1983	151	11	7.28477	2D-disc	False	24.9636
663.427	0.36948	10.3816	151	14.6667	9.71302	2D-disc	False	24.9774
619.227	0.654712	5.48226	151	14.3333	9.49227	2D-disc	False	25.0406
625.185	0.063145	57.4197	151	2.33333	1.54525	2D-disc	False	25.0539
613.309	0.169819	20.9647	151	4	2.64901	2D-disc	False	25.0772
784.088	0.037828	120.585	151	12.3333	8.16777	2D-disc	False	25.1319
728.852	0.027427	154.721	151	7	4.63576	2D-disc	False	25.152
748.725	0.290561	15.0587	151	7.66667	5.07726	2D-disc	False	25.2456
732.348	0.129929	32.9747	151	4.33333	2.86976	2D-disc	False	25.2728
545.692	0.145725	21.9297	151	2.33333	1.54525	2D-disc	False	25.299
472.508	0.258755	10.734	151	5.33333	3.53201	2D-disc	False	25.3935
761.296	0.279565	16.0304	151	10	6.62252	2D-disc	False	25.4306
215.733	0.038647	32.9031	151	2.66667	1.766	2D-disc	False	25.4636
269.586	0.09775	16.2723	151	3	1.98676	2D-disc	False	25.4889
551.075	0.310084	10.5159	151	2.66667	1.766	2D-disc	False	25.5622
791.078	0.258387	18.1322	151	8	5.29801	2D-disc	False	25.585
516.269	0.127886	23.9112	151	2.66667	1.766	2D-disc	False	25.5877
653.396	0.142281	27.231	151	2.33333	1.54525	2D-disc	False	25.6163
636.979	0.026496	142.786	151	3	1.98676	2D-disc	False	25.6581
601.061	0.049025	72.9646	151	6	3.97351	2D-disc	False	25.7096
526.442	0.043139	72.77	151	2.66667	1.766	2D-disc	False	25.7606
668.39	0.048087	82.9809	151	4.66667	3.09051	2D-disc	False	25.7905
312.161	0.019236	96.9741	151	2	1.3245	2D-disc	False	25.8152
543.747	0.315075	10.3167	151	2.33333	1.54525	2D-disc	False	25.8251
792.463	0.08718	54.5801	151	11	7.28477	2D-disc	False	25.9392
635.887	0.142021	26.9003	151	3.33333	2.20751	2D-disc	False	25.9546
463.665	0.037741	74.0445	151	8.66667	5.73951	2D-disc	False	26.0367
702.673	0.107925	39.4499	151	6	3.97351	2D-disc	False	26.1757
751.078	0.193432	23.5493	151	13	8.60927	2D-disc	False	26.2002
296.805	0.01502	120.047	151	2	1.3245	2D-disc	False	26.2442
462.303	0.051101	55.0354	151	3	1.98676	2D-disc	False	26.2802
303.162	0.175614	10.5026	151	6.66667	4.41501	2D-disc	False	26.2823
344.041	0.209595	9.99798	151	2.33333	1.54525	2D-disc	False	26.3128
718.988	0.449964	9.74258	151	7.33333	4.85651	2D-disc	False	26.3399
365.188	0.223069	9.9919	151	3	1.98676	2D-disc	False	26.3666
774.131	0.164672	28.6925	151	18.6667	12.362	2D-disc	False	26.3668
632.495	0.175438	22.1059	151	9.66667	6.40177	2D-disc	False	26.4886
712.576	0.045994	95.0015	151	7.66667	5.07726	2D-disc	False	26.4901
556.906	0.604896	5.64955	151	3	1.98676	2D-disc	False	26.5092
722.741	0.630929	7.0489	151	7.66667	5.07726	2D-disc	False	26.5829
193.372	0.063377	18.8342	151	4.66667	3.09051	2D-disc	False	26.6666
618.977	0.123796	30.9268	151	5.66667	3.75276	2D-disc	False	26.7209
499.303	0.59379	5.20285	151	2	1.3245	2D-disc	False	26.7297
411.026	0.489076	5.24999	151	5	3.31126	2D-disc	False	26.9867
677.419	0.636887	6.64738	151	10	6.62252	2D-disc	False	26.9985
650.718	0.139194	29.2501	151	6.66667	4.41501	2D-disc	False	27.0295
655.072	0.150719	27.1959	151	9	5.96026	2D-disc	False	27.0313
703.744	0.564104	7.80815	151	8	5.29801	2D-disc	False	27.0381
539.892	0.546831	6.20592	151	5	3.31126	2D-disc	False	27.1541
689.868	0.051111	85.0201	151	6.66667	4.41501	2D-disc	False	27.2116
791.39	0.215613	23.1739	151	15.6667	10.3753	2D-disc	False	27.2751
390.06	0.139246	17.7365	151	3.33333	2.20751	2D-disc	False	27.3529
161.555	0.115993	8.83912	151	14.6667	9.71302	2D-disc	False	27.416
240.189	0.038111	40.0829	151	1.66667	1.10375	2D-disc	False	27.4752
329.443	0.032044	65.4723	151	2	1.3245	2D-disc	False	27.5111
681.023	0.044495	97.5257	151	9	5.96026	2D-disc	False	27.5266
676.089	0.030074	143.297	151	6.66667	4.41501	2D-disc	False	27.5365
404.875	0.023024	112.335	151	3	1.98676	2D-disc	False	27.5968
786.567	0.674693	7.46116	151	14.3333	9.49227	2D-disc	False	27.6478
525.95	0.024798	135.878	151	7.33333	4.85651	2D-disc	False	27.6761
634.79	0.279693	14.5595	151	7	4.63576	2D-disc	False	27.7128
730.553	0.070514	66.561	151	4.33333	2.86976	2D-disc	False	27.7541
378.807	0.065541	37.2496	151	4.66667	3.09051	2D-disc	False	27.842
574.372	0.105862	35.0013	151	3.33333	2.20751	2D-disc	False	27.8686
466.724	0.525109	5.74065	151	7	4.63576	2D-disc	False	27.9019
613.96	0.743937	5.34326	151	9.33333	6.18102	2D-disc	False	27.9696
661.938	0.414957	10.346	151	7	4.63576	2D-disc	False	28.0182
793.336	0.17299	29.8494	151	15.6667	10.3753	2D-disc	False	28.1179
378.874	0.250492	9.85322	151	1.66667	1.10375	2D-disc	False	28.1424
263.644	0.088546	19.4193	151	3.33333	2.20751	2D-disc	False	28.1752
474.039	0.381609	8.10493	151	4.33333	2.86976	2D-disc	False	28.1863
334.013	0.164621	13.2505	151	4	2.64901	2D-disc	False	28.2123
630.673	0.359797	11.461	151	6.33333	4.19426	2D-disc	False	28.2461
293.35	0.0482	39.8882	151	2.33333	1.54525	2D-disc	False	28.3133
676.209	0.044855	99.0198	151	7	4.63576	2D-disc	False	28.375
652.03	0.059044	72.7192	151	3.66667	2.42826	2D-disc	False	28.4473
791.152	0.231123	22.545	151	14.6667	9.71302	2D-disc	False	28.4523
540.279	0.037485	95.3272	151	5.33333	3.53201	2D-disc	False	28.572
393.522	0.254996	10.2265	151	1.66667	1.10375	2D-disc	False	28.627
543.44	0.111935	32.2476	151	3	1.98676	2D-disc	False	28.6942
581.663	0.205511	18.8294	151	3.33333	2.20751	2D-disc	False	28.7398
537.2	0.498676	7.17312	151	6.33333	4.19426	2D-disc	False	28.7657
586.171	0.083284	46.9272	151	6.33333	4.19426	2D-disc	False	28.8035
788.263	0.034047	154.801	151	24.3333	16.1148	2D-disc	False	28.8846
670.813	0.811218	5.53696	151	13.6667	9.05077	2D-disc	False	28.9262
412.011	0.035738	77.6568	151	2	1.3245	2D-disc	False	29.0995
730.114	0.044619	110.456	151	4	2.64901	2D-disc	False	29.161
596.16	0.346503	11.6219	151	3	1.98676	2D-disc	False	29.1814
182.741	0.055585	22.2467	151	4	2.64901	2D-disc	False	29.2328
576.302	0.043948	88.7541	151	5	3.31126	2D-disc	False	29.2389
746.325	0.035677	141.648	151	4.66667	3.09051	2D-disc	False	29.2519
564.803	0.572775	6.69574	151	3.33333	2.20751	2D-disc	False	29.3339
748.253	0.795188	6.39285	151	8.33333	5.51876	2D-disc	False	29.3494
602.895	0.110212	37.2617	151	7	4.63576	2D-disc	False	29.4262
789.041	0.036397	147.69	151	15.6667	10.3753	2D-disc	False	29.4307
686.242	0.092628	50.5037	151	8.66667	5.73951	2D-disc	False	29.4491
443.509	0.582188	5.19797	151	5.33333	3.53201	2D-disc	False	29.4767
552.97	0.066645	56.6745	151	2.66667	1.766	2D-disc	False	29.5079
337.958	0.169585	13.6387	151	3.33333	2.20751	2D-disc	False	29.5652
708.949	0.10063	48.2635	151	7	4.63576	2D-disc	False	29.5948
464.336	0.500991	6.37123	151	2.33333	1.54525	2D-disc	False	29.6964
444.371	0.085404	35.7924	151	4	2.64901	2D-disc	False	29.7171
444.112	0.060449	50.6137	151	5	3.31126	2D-disc	False	29.761
692.665	0.029943	159.629	151	8.66667	5.73951	2D-disc	False	29.8104
665.201	0.352081	13.0378	151	7.66667	5.07726	2D-disc	False	29.811
646.582	0.045387	98.5107	151	4.33333	2.86976	2D-disc	False	29.8728
627.973	0.036324	119.598	151	5.33333	3.53201	2D-disc	False	29.8855
571.567	0.035437	111.594	151	5.33333	3.53201	2D-disc	False	29.8891
248.394	0.027852	61.9783	151	3	1.98676	2D-disc	False	30.022
625.626	0.603117	7.20941	151	5	3.31126	2D-disc	False	30.0241
525.89	0.033508	109.561	151	7	4.63576	2D-disc	False	30.1573
770.19	0.113379	47.4323	151	9.33333	6.18102	2D-disc	False	30.1643
428.763	0.192848	15.5302	151	4.33333	2.86976	2D-disc	False	30.1758
725.687	0.095844	52.9749	151	7.33333	4.85651	2D-disc	False	30.2252
552.768	0.059641	64.8691	151	4.33333	2.86976	2D-disc	False	30.236
779.654	0.369922	14.8612	151	20.3333	13.4658	2D-disc	False	30.4611
637.079	0.028564	157.422	151	3.66667	2.42826	2D-disc	False	30.4913
411.008	0.128323	22.6115	151	5	3.31126	2D-disc	False	30.4977
506.243	0.024265	148.167	151	5	3.31126	2D-disc	False	30.6801
401.783	0.104791	27.2566	151	4	2.64901	2D-disc	False	30.7106
393.97	0.154057	18.1811	151	3	1.98676	2D-disc	False	30.7129
487.287	0.334578	10.3551	151	2.66667	1.766	2D-disc	False	30.7149
512.043	0.375146	9.70766	151	2	1.3245	2D-disc	False	30.725
720.43	0.171723	29.8476	151	5.66667	3.75276	2D-disc	False	30.7348
344.15	0.046802	52.3905	151	1.66667	1.10375	2D-disc	False	30.7789
251.583	0.015579	115.134	151	2.33333	1.54525	2D-disc	False	30.7996
677.885	0.92185	5.24651	151	18.3333	12.1413	2D-disc	False	30.8218
342.654	0.084801	28.8393	151	2	1.3245	2D-disc	False	30.8329
770.837	0.038354	143.741	151	21.3333	14.128	2D-disc	False	30.8967
480.319	0.443264	7.75044	151	4.66667	3.09051	2D-disc	False	30.8988
225.443	0.016264	99.156	151	6	3.97351	2D-disc	False	30.9025
778.813	0.080143	69.5532	151	13.3333	8.83002	2D-disc	False	30.9196
649.917	0.055181	84.5106	151	6	3.97351	2D-disc	False	30.9975
194.265	0.052498	26.5587	151	3.66667	2.42826	2D-disc	False	31.0054
794.901	0.181875	31.376	151	10.3333	6.84327	2D-disc	False	31.0128
406.471	0.454334	6.42938	151	3.33333	2.20751	2D-disc	False	31.0455
797.803	0.113144	50.7586	151	10	6.62252	2D-disc	False	31.0978
572.087	0.457645	9.01206	151	10.6667	7.06402	2D-disc	False	31.144
665.458	0.110012	43.6356	151	10.3333	6.84327	2D-disc	False	31.1633
576.098	0.161604	25.7224	151	4.33333	2.86976	2D-disc	False	31.171
607.965	0.464265	9.46953	151	3.66667	2.42826	2D-disc	False	31.2392
461.382	0.553433	6.03218	151	8	5.29801	2D-disc	False	31.2581
687.316	0.892693	5.57294	151	8.33333	5.51876	2D-disc	False	31.269
620.948	0.337927	13.3319	151	3.66667	2.42826	2D-disc	False	31.3432
752.248	0.059582	91.7079	151	3	1.98676	2D-disc	False	31.3794
686.67	0.359128	13.8895	151	11	7.28477	2D-disc	False	31.3814
766.382	0.038041	146.514	151	12.6667	8.38852	2D-disc	False	31.4174
628.915	0.750945	6.09618	151	2.33333	1.54525	2D-disc	False	31.4454
716.456	0.534086	9.77414	151	4.66667	3.09051	2D-disc	False	31.4763
764.089	0.229225	24.3097	151	8	5.29801	2D-disc	False	31.5051
559.746	0.042532	96.0648	151	2.66667	1.766	2D-disc	False	31.5336
662.413	0.042332	114.303	151	12	7.94702	2D-disc	False	31.5561
789.971	0.037298	154.79	151	20	13.245	2D-disc	False	31.572
709.792	0.109058	47.7979	151	10.6667	7.06402	2D-disc	False	31.7262
744.088	0.24727	22.1182	151	6	3.97351	2D-disc	False	31.7527
279.145	0.247425	8.30621	151	5.66667	3.75276	2D-disc	False	31.8054
599.194	0.046836	94.1929	151	9	5.96026	2D-disc	False	31.8064
662.867	0.662922	7.37072	151	11.3333	7.50552	2D-disc	False	31.8442
797.753	0.037379	158.131	151	7	4.63576	2D-disc	False	32.008
432.928	0.511333	6.27597	151	3	1.98676	2D-disc	False	32.0224
372.011	0.026887	102.599	151	1.66667	1.10375	2D-disc	False	32.0342
303.142	0.397092	5.68175	151	3	1.98676	2D-disc	False	32.1522
775.096	0.036571	157.936	151	28.6667	18.9845	2D-disc	False	32.1919
553.012	0.425277	9.69468	151	4.33333	2.86976	2D-disc	False	32.2073
692.653	0.240967	21.5093	151	5	3.31126	2D-disc	False	32.326
580.344	0.069942	62.129	151	2.66667	1.766	2D-disc	False	32.3468
699.244	0.520769	10.0568	151	9	5.96026	2D-disc	False	32.3565
428.52	0.024517	130.919	151	4.33333	2.86976	2D-disc	False	32.3581
764.003	0.360389	15.9073	151	12.3333	8.16777	2D-disc	False	32.4158
540.734	0.079701	51.0477	151	4.33333	2.86976	2D-disc	False	32.5042
564.188	0.036729	115.752	151	6	3.97351	2D-disc	False	32.5536
529.527	0.376785	10.5915	151	3	1.98676	2D-disc	False	32.5572
333.109	0.016058	157.003	151	12	7.94702	2D-disc	False	32.6962
631.296	0.586008	8.1545	151	3.33333	2.20751	2D-disc	False	32.7003
774.935	0.633291	9.29913	151	17	11.2583	2D-disc	False	32.8295
785.668	0.109986	54.3577	151	8	5.29801	2D-disc	False	32.8733
605.489	0.434557	10.6032	151	4	2.64901	2D-disc	False	32.8748
287.741	0.434045	5.05816	151	2.33333	1.54525	2D-disc	False	32.9617
789.129	0.580257	10.3952	151	23	15.2318	2D-disc	False	33.0208
208.172	0.037483	42.499	151	3.33333	2.20751	2D-disc	False	33.0578
627.589	0.675308	7.14034	151	4	2.64901	2D-disc	False	33.1917
758.021	0.993605	5.86639	151	15.3333	10.1545	2D-disc	False	33.219
792.72	0.756669	8.05944	151	8.66667	5.73951	2D-disc	False	33.2334
415.416	0.040956	78.0705	151	2.33333	1.54525	2D-disc	False	33.2511
264.756	0.374059	5.46323	151	6	3.97351	2D-disc	False	33.3447
740.163	0.355438	16.1235	151	4.33333	2.86976	2D-disc	False	33.4487
316.272	0.113927	21.5121	151	5.66667	3.75276	2D-disc	False	33.4759
666.999	0.273448	18.9556	151	11.6667	7.72627	2D-disc	False	33.5716
770.939	0.057533	104.21	151	19	12.5828	2D-disc	False	33.5962
567.272	0.362907	12.1701	151	4.66667	3.09051	2D-disc	False	33.6342
460.663	0.080013	44.8431	151	6.33333	4.19426	2D-disc	False	33.6477
589.73	0.060552	75.8941	151	3.66667	2.42826	2D-disc	False	33.6641
650.539	0.990607	5.12319	151	5.33333	3.53201	2D-disc	False	33.7017
618.148	0.253247	19.0485	151	3.66667	2.42826	2D-disc	False	33.713
570.798	0.046041	96.9934	151	7	4.63576	2D-disc	False	33.7978
780.879	0.090991	67.2279	151	13.3333	8.83002	2D-disc	False	33.8414
609.401	0.254991	18.7325	151	4.66667	3.09051	2D-disc	False	33.8611
571.391	0.290683	15.4756	151	4.33333	2.86976	2D-disc	False	34.0109
566.964	0.049153	90.8354	151	4.33333	2.86976	2D-disc	False	34.0199
649.537	0.040578	126.097	151	6	3.97351	2D-disc	False	34.031
792.06	0.148044	42.2009	151	15	9.93378	2D-disc	False	34.0752
710.472	0.242833	23.1764	151	6	3.97351	2D-disc	False	34.2208
328.394	0.262379	9.94788	151	7.66667	5.07726	2D-disc	False	34.3359
573.725	0.185653	24.5973	151	4	2.64901	2D-disc	False	34.385
299.484	0.134742	17.736	151	4.33333	2.86976	2D-disc	False	34.4721
574.558	0.082689	55.4479	151	7.33333	4.85651	2D-disc	False	34.4733
567.059	0.354941	12.7652	151	4.66667	3.09051	2D-disc	False	34.5174
680.838	0.315396	17.2768	151	15.6667	10.3753	2D-disc	False	34.5748
286.368	0.020333	112.784	151	1.66667	1.10375	2D-disc	False	34.5945
616.032	0.657156	7.53646	151	3.33333	2.20751	2D-disc	False	34.7309
553.272	0.030368	146.578	151	2.66667	1.766	2D-disc	False	34.7561
232.629	0.088482	21.1667	151	4	2.64901	2D-disc	False	34.7799
474.232	0.494595	7.72305	151	3.33333	2.20751	2D-disc	False	34.7962
483.336	0.031134	125.05	151	5.66667	3.75276	2D-disc	False	34.7981
289.665	0.034587	67.526	151	3.33333	2.20751	2D-disc	False	34.8315
343.498	0.16237	17.0723	151	3.33333	2.20751	2D-disc	False	34.8624
726.202	0.297609	19.7088	151	5.66667	3.75276	2D-disc	False	34.8925
638.188	0.135187	38.2484	151	3	1.98676	2D-disc	False	35.0012
484.885	0.693403	5.66599	151	3.33333	2.20751	2D-disc	False	35.0031
740.569	0.23915	25.1356	151	6.66667	4.41501	2D-disc	False	35.0653
430.124	0.179993	19.4104	151	4.66667	3.09051	2D-disc	False	35.0897
229.475	0.02373	78.6241	151	7.66667	5.07726	2D-disc	False	35.1238
695.215	0.040253	140.594	151	8.33333	5.51876	2D-disc	False	35.1665
698.983	0.039063	145.732	151	6	3.97351	2D-disc	False	35.1833
481.87	0.219389	17.9217	151	3.66667	2.42826	2D-disc	False	35.249
696.401	0.187696	30.3066	151	11.6667	7.72627	2D-disc	False	35.2871
471.723	0.698877	5.51427	151	3	1.98676	2D-disc	False	35.2928
608.492	0.050511	98.5916	151	3.33333	2.20751	2D-disc	False	35.3553
549.963	0.16424	27.4216	151	2.66667	1.766	2D-disc	False	35.377
635.53	0.040801	127.67	151	4.66667	3.09051	2D-disc	False	35.4085
231.232	0.207807	9.12849	151	8.33333	5.51876	2D-disc	False	35.4401
321.741	0.157082	16.8374	151	3	1.98676	2D-disc	False	35.5123
780.432	0.055742	115.234	151	17.3333	11.479	2D-disc	False	35.556
350.268	0.025641	112.471	151	3	1.98676	2D-disc	False	35.5681
761.148	0.048873	128.455	151	11.6667	7.72627	2D-disc	False	35.6316
612.895	0.135501	37.3677	151	6.66667	4.41501	2D-disc	False	35.6892
684.835	0.118151	47.9294	151	7.33333	4.85651	2D-disc	False	35.7221
674.992	0.101985	54.7297	151	8	5.29801	2D-disc	False	35.7227
726.836	0.131495	45.7374	151	5	3.31126	2D-disc	False	35.7461
260.743	0.132447	16.3072	151	5.66667	3.75276	2D-disc	False	35.7843
334.762	0.038549	71.9734	151	6	3.97351	2D-disc	False	35.8041
385.433	0.162212	19.7505	151	2	1.3245	2D-disc	False	35.9083
781.217	0.903414	7.18842	151	15.3333	10.1545	2D-disc	False	35.9114
553.631	0.24742	18.6149	151	5.66667	3.75276	2D-disc	False	35.9384
572.824	0.078847	60.442	151	4.33333	2.86976	2D-disc	False	35.9407
657.196	0.949834	5.764	151	15.3333	10.1545	2D-disc	False	35.9882
230.252	0.036058	53.2011	151	2.66667	1.766	2D-disc	False	35.9917
761.207	0.712922	8.91264	151	16.3333	10.8168	2D-disc	False	36.0603
486.228	0.046772	87.0186	151	3.33333	2.20751	2D-disc	False	36.1611
737.598	0.702906	8.81568	151	7	4.63576	2D-disc	False	36.2925
193.572	0.072296	22.5247	151	5.33333	3.53201	2D-disc	False	36.3424
739.807	0.142133	43.8368	151	4.33333	2.86976	2D-disc	False	36.383
567.788	0.303108	15.7906	151	7	4.63576	2D-disc	False	36.4162
561.986	0.050011	94.8313	151	4.33333	2.86976	2D-disc	False	36.4565
469.659	0.531135	7.46244	151	8	5.29801	2D-disc	False	36.4575
786.831	0.161051	41.2468	151	14.3333	9.49227	2D-disc	False	36.4717
605.938	0.247856	20.6469	151	5.66667	3.75276	2D-disc	False	36.4847
488.891	0.121289	34.1107	151	3.66667	2.42826	2D-disc	False	36.5581
720.344	0.707272	8.63592	151	14	9.27152	2D-disc	False	36.6301
635.296	0.390973	13.8018	151	4.66667	3.09051	2D-disc	False	36.6937
320.891	0.328592	8.29723	151	8	5.29801	2D-disc	False	36.7043
628.145	0.146142	36.5459	151	4.66667	3.09051	2D-disc	False	36.7314
501.153	0.184682	23.0793	151	3	1.98676	2D-disc	False	36.7418
374.727	0.031492	101.348	151	5	3.31126	2D-disc	False	36.7947
756.581	0.12427	51.86	151	11	7.28477	2D-disc	False	36.7983
761.67	0.123352	52.6058	151	10.3333	6.84327	2D-disc	False	36.8041
441.233	0.063674	59.0381	151	2.66667	1.766	2D-disc	False	36.8053
401.764	0.027824	123.068	151	3	1.98676	2D-disc	False	36.8196
492.972	0.032591	129.117	151	6	3.97351	2D-disc	False	36.8758
554.627	0.117634	40.2724	151	3.33333	2.20751	2D-disc	False	36.8997
518.165	0.286619	15.4492	151	4.66667	3.09051	2D-disc	False	36.917
342.405	0.04708	62.3569	151	6	3.97351	2D-disc	False	37.0395
703.906	0.106315	56.8288	151	12.6667	8.38852	2D-disc	False	37.0794
339.782	0.367445	7.9413	151	5.66667	3.75276	2D-disc	False	37.0994
770.464	0.145848	45.6032	151	20.3333	13.4658	2D-disc	False	37.293
390.572	0.670099	5.04891	151	6	3.97351	2D-disc	False	37.4213
762.983	0.27748	23.9352	151	16	10.596	2D-disc	False	37.6042
568.466	0.034653	142.801	151	10.6667	7.06402	2D-disc	False	37.6054
450.457	0.104303	37.647	151	2.66667	1.766	2D-disc	False	37.658
506.942	0.764782	5.77849	151	5	3.31126	2D-disc	False	37.6598
405.612	0.047162	75.0287	151	2.66667	1.766	2D-disc	False	37.6871
544.413	0.058861	80.7077	151	2	1.3245	2D-disc	False	37.6963
422.544	0.298729	12.3489	151	1.66667	1.10375	2D-disc	False	37.7154
585.211	0.180501	28.3489	151	3.66667	2.42826	2D-disc	False	37.7735
380.467	0.318989	10.4451	151	2.66667	1.766	2D-disc	False	37.8315
511.58	0.043714	102.556	151	3	1.98676	2D-disc	False	37.8574
490.83	0.027023	159.215	151	4.66667	3.09051	2D-disc	False	37.8679
294.286	0.076523	33.7367	151	3.66667	2.42826	2D-disc	False	37.8974
503.349	0.355294	12.4349	151	4.66667	3.09051	2D-disc	False	37.9178
729.718	0.046692	137.491	151	8.66667	5.73951	2D-disc	False	38.0055
726.372	0.044068	145.585	151	9.66667	6.40177	2D-disc	False	38.1562
781.125	0.668959	10.3596	151	24.6667	16.3355	2D-disc	False	38.327
695.302	0.144719	42.6641	151	10.6667	7.06402	2D-disc	False	38.3618
187.408	0.153587	10.8405	151	7.66667	5.07726	2D-disc	False	38.3797
717.932	0.617426	10.3369	151	5.33333	3.53201	2D-disc	False	38.4038
610.354	0.842689	6.44783	151	8.66667	5.73951	2D-disc	False	38.4577
691.782	0.048579	127.585	151	6.66667	4.41501	2D-disc	False	38.7047
775.89	0.250986	27.7303	151	14.3333	9.49227	2D-disc	False	38.7514
264.017	0.030135	78.7242	151	9.66667	6.40177	2D-disc	False	38.8179
471.92	0.115562	36.7055	151	2.33333	1.54525	2D-disc	False	38.8295
162.285	0.018543	78.6911	151	6.66667	4.41501	2D-disc	False	38.8429
565.702	0.588291	8.64785	151	3	1.98676	2D-disc	False	38.8505
280.65	0.106909	23.627	151	4.33333	2.86976	2D-disc	False	38.8814
741.698	0.187204	35.7324	151	12.6667	8.38852	2D-disc	False	38.9613
790.5	0.061138	116.773	151	14.3333	9.49227	2D-disc	False	39.0152
483.88	0.335675	13.0198	151	2.66667	1.766	2D-disc	False	39.0185
643.834	0.701142	8.30368	151	7.33333	4.85651	2D-disc	False	39.0649
240.719	0.363836	6.0111	151	18.3333	12.1413	2D-disc	False	39.2495
260.499	0.05179	45.8146	151	5	3.31126	2D-disc	False	39.3484
402.49	0.383519	9.58446	151	6.66667	4.41501	2D-disc	False	39.4533
665.484	0.828195	7.3575	151	10.3333	6.84327	2D-disc	False	39.5557
656.627	0.073849	81.4568	151	5	3.31126	2D-disc	False	39.5765
440.433	0.767298	5.2596	151	1.66667	1.10375	2D-disc	False	39.5841
749.053	0.845757	8.12252	151	7	4.63576	2D-disc	False	39.6194
604.364	0.666222	8.32286	151	10.3333	6.84327	2D-disc	False	39.6348
790.056	0.082288	88.2273	151	22.3333	14.7903	2D-disc	False	39.6977
695.571	0.318531	20.076	151	12.6667	8.38852	2D-disc	False	39.7165
368.975	0.208165	16.3292	151	4.33333	2.86976	2D-disc	False	39.7978
568.498	0.067891	77.1984	151	3.33333	2.20751	2D-disc	False	39.8268
704.067	0.060253	107.798	151	9	5.96026	2D-disc	False	39.8527
482.498	0.192205	23.1909	151	4.33333	2.86976	2D-disc	False	39.909
536.05	0.244906	20.2301	151	6.33333	4.19426	2D-disc	False	39.9279
626.927	0.755869	7.66671	151	4.66667	3.09051	2D-disc	False	39.9321
673.854	0.423308	14.7168	151	6.66667	4.41501	2D-disc	False	39.9381
361.474	0.49579	6.75065	151	5	3.31126	2D-disc	False	39.999
640.331	0.186505	31.8164	151	5.66667	3.75276	2D-disc	False	40.0332
674.813	0.320148	19.5414	151	8.66667	5.73951	2D-disc	False	40.0504
789.359	0.21989	33.3273	151	6.33333	4.19426	2D-disc	False	40.1066
498.58	0.058808	78.8129	151	6.66667	4.41501	2D-disc	False	40.159
445.779	0.048922	84.9245	151	4.33333	2.86976	2D-disc	False	40.2625
557.661	0.926216	5.61636	151	8	5.29801	2D-disc	False	40.2977
736.165	0.055224	124.462	151	9	5.96026	2D-disc	False	40.3341
697.964	0.403571	16.1763	151	11.3333	7.50552	2D-disc	False	40.4064
789.92	0.445012	16.6269	151	19.3333	12.8035	2D-disc	False	40.4654
504.106	0.714291	6.61417	151	2	1.3245	2D-disc	False	40.4867
282.17	0.076725	34.5313	151	2.66667	1.766	2D-disc	False	40.5623
652.625	0.504834	12.139	151	10	6.62252	2D-disc	False	40.5649
785.836	0.117312	62.9391	151	23.6667	15.6733	2D-disc	False	40.5896
540.14	0.693724	7.31618	151	7	4.63576	2D-disc	False	40.5928
695.932	0.341124	19.1705	151	5.33333	3.53201	2D-disc	False	40.5941
543.726	0.038413	133.392	151	7	4.63576	2D-disc	False	40.7111
718.643	0.997067	6.79439	151	4	2.64901	2D-disc	False	40.7235
670.019	0.10039	62.9362	151	9.66667	6.40177	2D-disc	False	40.7369
559.316	0.069212	76.3464	151	2.33333	1.54525	2D-disc	False	40.8128
739.358	0.058131	120.171	151	10	6.62252	2D-disc	False	40.8165
763.68	0.916186	7.87857	151	17.6667	11.6998	2D-disc	False	40.8322
505.928	0.103664	46.1469	151	4.33333	2.86976	2D-disc	False	40.8475
576.694	0.065782	82.9291	151	3	1.98676	2D-disc	False	40.8651
562.109	0.205103	26.0046	151	6.33333	4.19426	2D-disc	False	40.9907
660.451	0.098792	63.4566	151	4.66667	3.09051	2D-disc	False	41.0054
628.952	0.039403	151.535	151	9.66667	6.40177	2D-disc	False	41.0117
785.448	0.110926	67.2611	151	20.3333	13.4658	2D-disc	False	41.0359
167.672	0.041792	38.1511	151	7.33333	4.85651	2D-disc	False	41.0794
560.995	0.185758	28.7342	151	3.33333	2.20751	2D-disc	False	41.1027
542.038	0.453123	11.3857	151	3.66667	2.42826	2D-disc	False	41.1178
261.221	0.021267	117.109	151	6	3.97351	2D-disc	False	41.1883
695.668	0.078037	85.0771	151	5.33333	3.53201	2D-disc	False	41.2283
535.432	0.200147	25.5472	151	2.33333	1.54525	2D-disc	False	41.2546
741.383	0.560554	12.6445	151	12.6667	8.38852	2D-disc	False	41.3009
710.371	0.669902	10.1628	151	7.66667	5.07726	2D-disc	False	41.4023
775.764	0.538397	13.8181	151	11.6667	7.72627	2D-disc	False	41.4291
584.495	0.712593	7.87004	151	8.33333	5.51876	2D-disc	False	41.4497
743.261	0.080262	88.8904	151	10.3333	6.84327	2D-disc	False	41.4674
291.201	0.026232	106.674	151	4.66667	3.09051	2D-disc	False	41.5124
530.359	0.335128	15.2159	151	3.66667	2.42826	2D-disc	False	41.5358
481.311	0.330024	14.0247	151	5	3.31126	2D-disc	False	41.543
591.798	0.044641	127.539	151	8	5.29801	2D-disc	False	41.5611
655.103	0.224632	28.0701	151	5.66667	3.75276	2D-disc	False	41.5805
701.778	0.382232	17.6935	151	3.33333	2.20751	2D-disc	False	41.6318
654.817	0.043637	145.02	151	12.6667	8.38852	2D-disc	False	41.7491
245.219	0.065926	35.9631	151	4	2.64901	2D-disc	False	41.768
543.394	0.513991	10.232	151	4.66667	3.09051	2D-disc	False	41.8104
450.012	0.351788	12.3884	151	3.66667	2.42826	2D-disc	False	41.8366
590.122	0.123203	46.3952	151	6	3.97351	2D-disc	False	41.8443
417.444	0.612544	6.60836	151	6	3.97351	2D-disc	False	41.8906
220.554	0.025906	82.7653	151	8	5.29801	2D-disc	False	41.997
447.578	0.248695	17.5039	151	6	3.97351	2D-disc	False	42.0163
796.534	0.327951	23.6418	151	13.6667	9.05077	2D-disc	False	42.0503
209.122	0.144752	14.0655	151	14	9.27152	2D-disc	False	42.0596
767.848	0.344183	21.7512	151	5.66667	3.75276	2D-disc	False	42.1193
383.072	0.203807	18.3649	151	4.33333	2.86976	2D-disc	False	42.2097
658.897	0.085193	75.8044	151	9.66667	6.40177	2D-disc	False	42.3414
516.044	0.19955	25.3613	151	4.66667	3.09051	2D-disc	False	42.3662
538.659	0.09797	53.9656	151	3.33333	2.20751	2D-disc	False	42.4014
757.801	0.148738	50.1347	151	10.6667	7.06402	2D-disc	False	42.5098
468.213	0.052985	87.0124	151	3.33333	2.20751	2D-disc	False	42.5377
510.565	0.523382	9.63285	151	3.66667	2.42826	2D-disc	False	42.6586
586.113	0.06826	84.8289	151	6.33333	4.19426	2D-disc	False	42.6788
771.995	0.094586	80.6397	151	11.3333	7.50552	2D-disc	False	42.682
755.186	0.049329	151.357	151	14	9.27152	2D-disc	False	42.7104
772.444	0.061173	124.958	151	23	15.2318	2D-disc	False	42.7505
714.472	0.066873	105.934	151	7	4.63576	2D-disc	False	42.8336
196.927	0.0184	106.441	151	10.6667	7.06402	2D-disc	False	42.964
536.397	0.345218	15.4707	151	5.66667	3.75276	2D-disc	False	43.0132
403.641	0.604745	6.65252	151	3.66667	2.42826	2D-disc	False	43.0573
367.754	0.132051	27.7725	151	2.66667	1.766	2D-disc	False	43.0807
395.481	0.28243	13.9658	151	4	2.64901	2D-disc	False	43.0858
583.511	0.093928	61.9607	151	5.33333	3.53201	2D-disc	False	43.087
185.469	0.037701	49.0781	151	7	4.63576	2D-disc	False	43.0975
536.992	0.274876	19.5158	151	4.33333	2.86976	2D-disc	False	43.1559
741.343	0.176166	42.1014	151	4	2.64901	2D-disc	False	43.2198
756.26	0.058123	130.435	151	14.6667	9.71302	2D-disc	False	43.3066
768.21	0.228717	33.6974	151	20	13.245	2D-disc	False	43.3409
498.734	0.04485	111.614	151	3.66667	2.42826	2D-disc	False	43.3606
738.5	0.214968	34.5614	151	7.66667	5.07726	2D-disc	False	43.4609
699.873	0.132996	52.9747	151	12.3333	8.16777	2D-disc	False	43.4882
765.742	0.234268	32.9252	151	11.3333	7.50552	2D-disc	False	43.5154
594.494	0.051407	116.765	151	7.33333	4.85651	2D-disc	False	43.6187
410.96	0.062371	66.5831	151	2.66667	1.766	2D-disc	False	43.6547
260.426	0.333793	7.89396	151	6	3.97351	2D-disc	False	43.709
163.472	0.135758	12.1863	151	14.6667	9.71302	2D-disc	False	43.7197
734.85	0.051886	143.38	151	8.33333	5.51876	2D-disc	False	43.7346
480.158	0.407831	11.9352	151	5.33333	3.53201	2D-disc	False	43.7935
733.501	0.169802	43.7949	151	7.66667	5.07726	2D-disc	False	43.7975
465.974	0.252048	18.7644	151	5.66667	3.75276	2D-disc	False	43.8469
476.762	0.046561	104.018	151	4.66667	3.09051	2D-disc	False	43.8845
560.967	0.231057	24.6784	151	3.33333	2.20751	2D-disc	False	43.912
687.767	0.217919	32.084	151	10	6.62252	2D-disc	False	43.9164
310.621	0.438931	7.20583	151	5.66667	3.75276	2D-disc	False	43.9879
260.306	0.076145	34.8326	151	5.33333	3.53201	2D-disc	False	44.0177
200.235	0.174784	11.6887	151	9.33333	6.18102	2D-disc	False	44.0771
781.371	0.071556	111.543	151	11.3333	7.50552	2D-disc	False	44.1282
703.584	0.788596	9.13653	151	5.66667	3.75276	2D-disc	False	44.2388
761.494	0.054953	142.213	151	21.3333	14.128	2D-disc	False	44.3351
777.717	0.107821	74.0379	151	10.3333	6.84327	2D-disc	False	44.3424
799.126	0.547902	14.9808	151	8.33333	5.51876	2D-disc	False	44.3717
473.936	0.03835	126.954	151	4.66667	3.09051	2D-disc	False	44.3789
532.299	0.263291	20.7935	151	10	6.62252	2D-disc	False	44.4315
509.253	0.068915	76.181	151	5.66667	3.75276	2D-disc	False	44.5359
370.872	0.119583	31.9773	151	2.33333	1.54525	2D-disc	False	44.5422
764.305	0.269606	29.2593	151	16.3333	10.8168	2D-disc	False	44.5872
460.561	0.156124	30.448	151	5.66667	3.75276	2D-disc	False	44.5887
172.536	0.090443	19.7084	151	13	8.60927	2D-disc	False	44.6305
525.41	0.689663	7.87773	151	4.33333	2.86976	2D-disc	False	44.6707
505.705	0.037371	140.108	151	17.6667	11.6998	2D-disc	False	44.7285
788.094	0.221427	36.8615	151	9.33333	6.18102	2D-disc	False	44.7413
544.079	0.099315	56.8144	151	2	1.3245	2D-disc	False	44.8018
329.613	0.222094	15.3999	151	6.66667	4.41501	2D-disc	False	44.8265
736.218	0.446072	17.1292	151	4.66667	3.09051	2D-disc	False	44.8353
688.862	0.06333	112.91	151	8.33333	5.51876	2D-disc	False	44.843
787.726	0.381751	21.4382	151	11.3333	7.50552	2D-disc	False	44.8825
174.646	0.03801	47.7621	151	10.6667	7.06402	2D-disc	False	44.9062
421.274	0.371534	11.7892	151	7.33333	4.85651	2D-disc	False	44.9161
284.741	0.570097	5.19702	151	14.6667	9.71302	2D-disc	False	44.9507
728.222	0.108159	70.1579	151	11	7.28477	2D-disc	False	45.0152
587.714	0.47539	12.9006	151	6.66667	4.41501	2D-disc	False	45.0793
795.95	0.807567	10.2856	151	16.6667	11.0375	2D-disc	False	45.0823
762.507	0.126356	63.021	151	21.3333	14.128	2D-disc	False	45.115
192.056	0.388701	5.16081	151	41	27.1523	2D-disc	False	45.1221
588.573	0.069152	88.9599	151	4	2.64901	2D-disc	False	45.1525
755.811	0.96803	8.18397	151	5	3.31126	2D-disc	False	45.2818
572.521	0.095342	62.9721	151	7.66667	5.07726	2D-disc	False	45.3028
574.417	0.181012	33.2818	151	3.33333	2.20751	2D-disc	False	45.3075
372.566	0.042217	92.6004	151	6.66667	4.41501	2D-disc	False	45.3295
762.836	0.051581	155.406	151	15.6667	10.3753	2D-disc	False	45.3952
572.365	0.059933	100.363	151	7	4.63576	2D-disc	False	45.3992
385.929	0.126245	32.13	151	6.66667	4.41501	2D-disc	False	45.4048
153.474	0.295303	5.46286	151	152	100.662	2D-disc	False	45.4083
783.875	0.079317	103.984	151	11.6667	7.72627	2D-disc	False	45.4539
594.402	0.055714	112.68	151	6	3.97351	2D-disc	False	45.6264
695.711	0.27253	27.0458	151	7	4.63576	2D-disc	False	45.7687
594.75	0.065393	96.5394	151	3.66667	2.42826	2D-disc	False	45.8549
620.083	0.090349	73.0435	151	3.33333	2.20751	2D-disc	False	45.9768
692.793	0.102695	71.8278	151	8	5.29801	2D-disc	False	45.9962
793.471	0.248009	34.1272	151	16	10.596	2D-disc	False	46.0809
455.789	0.059959	81.1453	151	5	3.31126	2D-disc	False	46.1145
470.125	0.878838	5.71039	151	6	3.97351	2D-disc	False	46.1152
775.707	0.148689	55.751	151	13.3333	8.83002	2D-disc	False	46.1655
479.911	0.100358	51.1217	151	4	2.64901	2D-disc	False	46.1828
288.144	0.144255	21.3652	151	2.66667	1.766	2D-disc	False	46.2075
726.465	0.065168	119.338	151	7	4.63576	2D-disc	False	46.2468
513.773	0.140172	39.239	151	7	4.63576	2D-disc	False	46.2479
338.026	0.218051	16.6071	151	8.66667	5.73951	2D-disc	False	46.2792
745.15	0.20754	38.5297	151	4.33333	2.86976	2D-disc	False	46.3594
507.813	0.751426	7.25238	151	8.33333	5.51876	2D-disc	False	46.3603
669.582	0.754626	9.54479	151	6	3.97351	2D-disc	False	46.4706
387.72	0.519502	8.0329	151	6.33333	4.19426	2D-disc	False	46.497
770.619	0.257502	32.2109	151	12	7.94702	2D-disc	False	46.4974
689.512	0.427202	17.3726	151	11.6667	7.72627	2D-disc	False	46.4986
725.136	0.872376	8.9624	151	6.66667	4.41501	2D-disc	False	46.5792
501.962	0.976712	5.56372	151	1.66667	1.10375	2D-disc	False	46.7676
723.019	0.197335	39.6671	151	11.3333	7.50552	2D-disc	False	46.7701
557.052	0.137139	44.0141	151	3.66667	2.42826	2D-disc	False	46.8102
237.851	0.079615	32.3756	151	2	1.3245	2D-disc	False	46.8156
773.172	0.116558	71.9365	151	11.6667	7.72627	2D-disc	False	46.8488
480.655	0.436159	11.978	151	4.33333	2.86976	2D-disc	False	46.9547
588.05	0.05326	120.059	151	9	5.96026	2D-disc	False	46.9749
590.765	0.07385	86.9906	151	8	5.29801	2D-disc	False	46.9777
557.626	0.061172	99.1892	151	1.66667	1.10375	2D-disc	False	47.0065
598.375	0.765087	8.52476	151	4.66667	3.09051	2D-disc	False	47.0872
750.099	0.087651	93.3227	151	9.33333	6.18102	2D-disc	False	47.1096
791.905	0.178127	48.6592	151	10.3333	6.84327	2D-disc	False	47.2831
672.637	0.107957	68.2047	151	7	4.63576	2D-disc	False	47.2898
506.162	0.483303	11.4709	151	2	1.3245	2D-disc	False	47.3163
761.859	0.478046	17.4597	151	17.6667	11.6998	2D-disc	False	47.3277
579.242	0.317916	19.9635	151	7.33333	4.85651	2D-disc	False	47.3339
605.556	0.263421	25.2275	151	4	2.64901	2D-disc	False	47.4082
572.347	0.288001	21.8204	151	5	3.31126	2D-disc	False	47.433
197.53	0.058543	37.0475	151	7.66667	5.07726	2D-disc	False	47.4333
533.022	0.176827	33.1237	151	8.33333	5.51876	2D-disc	False	47.4707
557.095	0.243243	25.1875	151	2.66667	1.766	2D-disc	False	47.5094
773.867	0.857717	9.94777	151	26.6667	17.66	2D-disc	False	47.6307
659.585	0.314513	23.1289	151	7.33333	4.85651	2D-disc	False	47.6438
712.002	0.057466	136.77	151	5.33333	3.53201	2D-disc	False	47.6875
750.772	0.056022	148.071	151	4.33333	2.86976	2D-disc	False	47.7313
532.501	0.39912	14.7467	151	3.33333	2.20751	2D-disc	False	47.7486
649.956	0.454599	15.8185	151	7.33333	4.85651	2D-disc	False	47.7962
176.061	0.10392	18.7949	151	19.3333	12.8035	2D-disc	False	47.9247
428.53	0.045045	105.672	151	10.6667	7.06402	2D-disc	False	47.9854
654.902	0.589065	12.3578	151	6	3.97351	2D-disc	False	48.0188
659.498	0.59044	12.4412	151	20	13.245	2D-disc	False	48.1182
693.227	0.497827	15.5195	151	10.3333	6.84327	2D-disc	False	48.1465
301.595	0.332734	10.1064	151	6	3.97351	2D-disc	False	48.1674
677.512	0.613867	12.3081	151	7	4.63576	2D-disc	False	48.1763
523.869	0.194597	30.0277	151	3.66667	2.42826	2D-disc	False	48.1857
424.681	0.294462	16.0947	151	4.33333	2.86976	2D-disc	False	48.2095
695.067	0.101717	76.327	151	4.66667	3.09051	2D-disc	False	48.2535
462.438	0.682803	7.5689	151	9	5.96026	2D-disc	False	48.279
736.56	0.052348	157.349	151	9.66667	6.40177	2D-disc	False	48.3103
526.194	0.20697	28.4696	151	6.33333	4.19426	2D-disc	False	48.3756
684.85	0.279874	27.4395	151	8.66667	5.73951	2D-disc	False	48.4426
216.111	0.041003	59.2765	151	11	7.28477	2D-disc	False	48.5853
487.473	0.323798	16.9397	151	3.33333	2.20751	2D-disc	False	48.6086
632.879	0.670069	10.6335	151	4	2.64901	2D-disc	False	48.636
685.069	0.403605	19.1528	151	10.6667	7.06402	2D-disc	False	48.7459
423.727	0.091456	52.3794	151	1.66667	1.10375	2D-disc	False	48.8393
751.167	0.200896	42.2915	151	5.66667	3.75276	2D-disc	False	48.862
358.209	0.559565	7.24985	151	4.66667	3.09051	2D-disc	False	48.9246
710.383	0.254999	31.5705	151	4.66667	3.09051	2D-disc	False	48.9566
727.636	0.105527	78.181	151	7.33333	4.85651	2D-disc	False	48.9818
386.667	0.21463	20.436	151	3.33333	2.20751	2D-disc	False	49.0043
576.803	0.079089	82.7322	151	7	4.63576	2D-disc	False	49.0057
508.529	0.250281	23.0735	151	7	4.63576	2D-disc	False	49.0579
494.792	0.658208	8.54119	151	3	1.98676	2D-disc	False	49.0843
767.602	0.279476	31.2165	151	13.6667	9.05077	2D-disc	False	49.0995
716.55	0.053396	152.834	151	8	5.29801	2D-disc	False	49.2
446.877	0.162486	31.3923	151	4	2.64901	2D-disc	False	49.3101
550.874	0.051142	122.953	151	6	3.97351	2D-disc	False	49.3114
479.612	0.101704	54.0649	151	5.66667	3.75276	2D-disc	False	49.5276
444.646	0.236025	21.6094	151	2	1.3245	2D-disc	False	49.5531
269.783	0.118445	26.1575	151	7.66667	5.07726	2D-disc	False	49.6116
739.592	0.213169	39.8511	151	5	3.31126	2D-disc	False	49.6199
717.036	0.063948	128.843	151	5.66667	3.75276	2D-disc	False	49.64
367.089	0.028922	145.859	151	4.66667	3.09051	2D-disc	False	49.6447
670.384	0.149263	51.6446	151	4.33333	2.86976	2D-disc	False	49.6749
508.443	0.116795	50.0764	151	4	2.64901	2D-disc	False	49.6934
629.41	0.050626	143.125	151	4.33333	2.86976	2D-disc	False	49.7323
593.433	0.648514	10.5365	151	3.66667	2.42826	2D-disc	False	49.7427
389.238	0.533154	8.4094	151	6.33333	4.19426	2D-disc	False	49.7607
697.481	0.053659	149.756	151	14	9.27152	2D-disc	False	49.7713
528.618	0.38774	15.719	151	4.66667	3.09051	2D-disc	False	49.8089
411.045	0.202734	23.3803	151	4	2.64901	2D-disc	False	49.8161
730.189	0.056098	150.381	151	9.66667	6.40177	2D-disc	False	49.9103
243.324	0.197123	14.2658	151	10.3333	6.84327	2D-disc	False	49.9266
507.039	0.293694	19.9554	151	5.33333	3.53201	2D-disc	False	49.9342
764.281	0.652297	13.5443	151	6.66667	4.41501	2D-disc	False	49.9383
259.075	0.095472	31.3779	151	3	1.98676	2D-disc	False	49.9525
666.146	0.079287	97.2155	151	8	5.29801	2D-disc	False	49.9864
723.846	0.608785	13.7598	151	2.66667	1.766	2D-disc	False	49.9934
249.806	0.036711	78.7816	151	7	4.63576	2D-disc	False	50.0153
600.404	0.34786	19.9975	151	7.33333	4.85651	2D-disc	False	50.052
257.454	0.136974	21.8163	151	9	5.96026	2D-disc	False	50.1422
453.612	0.25856	20.364	151	7.66667	5.07726	2D-disc	False	50.1445
716.521	0.401941	20.6972	151	9.33333	6.18102	2D-disc	False	50.1567
530.69	0.630466	9.78619	151	2.66667	1.766	2D-disc	False	50.2248
495.429	0.094497	60.9604	151	3	1.98676	2D-disc	False	50.2306
202.89	0.134969	17.4791	151	9.33333	6.18102	2D-disc	False	50.2314
533.143	0.164678	37.6701	151	2.66667	1.766	2D-disc	False	50.2658
305.896	0.431108	8.26202	151	12	7.94702	2D-disc	False	50.3017
775.997	0.251884	35.8912	151	38.3333	25.3863	2D-disc	False	50.3284
645.623	0.589829	12.7575	151	9.33333	6.18102	2D-disc	False	50.3496
695.358	0.525405	15.4265	151	6	3.97351	2D-disc	False	50.3543
590.071	0.064489	106.834	151	4.33333	2.86976	2D-disc	False	50.4399
151.623	0.021275	83.3736	151	22.6667	15.011	2D-disc	False	50.5379
342.047	0.037145	107.764	151	8	5.29801	2D-disc	False	50.5558
665.67	0.624979	12.4702	151	9.33333	6.18102	2D-disc	False	50.5781
634.925	0.063047	117.96	151	5.66667	3.75276	2D-disc	False	50.6014
735.891	0.680085	12.6752	151	8.33333	5.51876	2D-disc	False	50.6044
260.401	0.176539	17.3061	151	9.33333	6.18102	2D-disc	False	50.6853
600.569	0.108919	64.6982	151	5.66667	3.75276	2D-disc	False	50.6894
574.968	0.084736	79.657	151	4.66667	3.09051	2D-disc	False	50.7145
514.523	0.73813	8.1884	151	4.66667	3.09051	2D-disc	False	50.747
630.305	0.190571	38.8639	151	6	3.97351	2D-disc	False	50.7617
614.925	0.064748	111.757	151	4.33333	2.86976	2D-disc	False	50.8349
436.224	0.55153	9.30883	151	6.33333	4.19426	2D-disc	False	50.8438
717.961	0.11728	72.287	151	6	3.97351	2D-disc	False	51.0114
528.15	0.583809	10.6857	151	3	1.98676	2D-disc	False	51.027
763.17	0.255086	35.3749	151	15.3333	10.1545	2D-disc	False	51.0791
690.768	0.051445	158.788	151	15	9.93378	2D-disc	False	51.0872
152.033	0.072267	24.8825	151	14.6667	9.71302	2D-disc	False	51.0952
488.227	0.340667	16.9939	151	3.33333	2.20751	2D-disc	False	51.2255
627.676	0.071999	103.679	151	7.66667	5.07726	2D-disc	False	51.3765
724.832	0.564849	15.2692	151	8.66667	5.73951	2D-disc	False	51.4036
305.954	0.620094	5.87317	151	13.6667	9.05077	2D-disc	False	51.4231
639.902	0.184059	41.4058	151	3.66667	2.42826	2D-disc	False	51.4503
586.718	0.545132	12.8184	151	3	1.98676	2D-disc	False	51.4506
507.188	0.142108	42.5171	151	5	3.31126	2D-disc	False	51.4633
529.594	0.466425	13.5291	151	3.33333	2.20751	2D-disc	False	51.4745
657.086	0.229698	34.1017	151	9.33333	6.18102	2D-disc	False	51.4985
764.625	0.756731	12.0492	151	15.3333	10.1545	2D-disc	False	51.5149
610.321	0.050054	145.405	151	8	5.29801	2D-disc	False	51.5163
766.675	0.09744	93.9923	151	17.6667	11.6998	2D-disc	False	51.6062
466.062	0.10198	54.6725	151	2.33333	1.54525	2D-disc	False	51.6802
539.38	0.106573	60.6912	151	4	2.64901	2D-disc	False	51.8038
799.009	0.239854	39.9525	151	17.6667	11.6998	2D-disc	False	51.8112
592.349	0.40556	17.52	151	5.33333	3.53201	2D-disc	False	51.8196
760.408	0.170992	53.3489	151	8.66667	5.73951	2D-disc	False	51.8249
252.257	0.023981	126.326	151	9	5.96026	2D-disc	False	51.8803
702.921	0.565648	14.9304	151	6.66667	4.41501	2D-disc	False	51.9034
664.652	0.982714	8.14075	151	13	8.60927	2D-disc	False	51.9973
791.125	0.062407	152.892	151	15	9.93378	2D-disc	False	52.1021
634.824	0.921619	8.30803	151	2.66667	1.766	2D-disc	False	52.1051
788.587	0.181375	52.4443	151	19.3333	12.8035	2D-disc	False	52.1086
798.17	0.071327	135.445	151	7.33333	4.85651	2D-disc	False	52.2883
565.864	0.052137	131.423	151	14.6667	9.71302	2D-disc	False	52.3107
369.384	0.045384	99.0932	151	2.66667	1.766	2D-disc	False	52.596
729.225	0.092971	95.6526	151	3.33333	2.20751	2D-disc	False	52.6825
795.709	0.17383	55.8399	151	8.33333	5.51876	2D-disc	False	52.6986
733.235	0.065002	137.612	151	9	5.96026	2D-disc	False	52.7016
568.076	0.049572	139.81	151	10	6.62252	2D-disc	False	52.7052
718.696	0.273267	32.0926	151	2.66667	1.766	2D-disc	False	52.7147
275.665	0.031682	106.209	151	11	7.28477	2D-disc	False	52.7324
255.943	0.0756	41.3506	151	6.66667	4.41501	2D-disc	False	52.7649
452.304	0.214323	25.7969	151	6.33333	4.19426	2D-disc	False	52.8067
388.634	0.347726	13.6645	151	7	4.63576	2D-disc	False	52.8171
751.449	0.515371	17.8272	151	10.6667	7.06402	2D-disc	False	52.8187
641.828	0.082043	95.681	151	8	5.29801	2D-disc	False	52.8363
666.764	0.513646	15.8954	151	14.6667	9.71302	2D-disc	False	52.8991
247.071	0.580449	5.21717	151	30.3333	20.0883	2D-disc	False	52.9494
760.809	0.246664	37.8244	151	10	6.62252	2D-disc	False	52.9769
231.754	0.17928	15.8633	151	12.3333	8.16777	2D-disc	False	53.0129
730.554	0.862785	10.4079	151	7.33333	4.85651	2D-disc	False	53.1001
196.519	0.347215	6.96719	151	38	25.1656	2D-disc	False	53.1783
480.688	0.348659	16.9768	151	8	5.29801	2D-disc	False	53.1958
456.725	0.473021	11.8908	151	6.66667	4.41501	2D-disc	False	53.2013
227.349	0.067648	41.389	151	5.33333	3.53201	2D-disc	False	53.2024
404.566	0.959768	5.19245	151	5.66667	3.75276	2D-disc	False	53.2149
452.235	0.61808	9.01324	151	2.66667	1.766	2D-disc	False	53.2163
508.897	0.218297	28.7209	151	2	1.3245	2D-disc	False	53.2231
739.103	0.072583	125.644	151	5.33333	3.53201	2D-disc	False	53.3035
744.951	0.250698	36.6777	151	4.66667	3.09051	2D-disc	False	53.3223
451.998	0.063857	87.3958	151	4	2.64901	2D-disc	False	53.3392
611.557	0.828708	9.11228	151	9.33333	6.18102	2D-disc	False	53.3427
418.612	0.174159	29.7146	151	4.33333	2.86976	2D-disc	False	53.4056
618.4	0.198765	38.4643	151	2.33333	1.54525	2D-disc	False	53.4087
766.583	0.235	40.3422	151	13.6667	9.05077	2D-disc	False	53.4259
588.57	0.210939	34.5083	151	4.33333	2.86976	2D-disc	False	53.4276
490.436	0.135413	44.8932	151	4	2.64901	2D-disc	False	53.5478
774.781	0.535517	17.9371	151	15	9.93378	2D-disc	False	53.5587
758.474	0.58271	16.1721	151	6.33333	4.19426	2D-disc	False	53.6737
373.059	0.738542	6.27778	151	6.33333	4.19426	2D-disc	False	53.6893
379.069	0.096453	48.874	151	9.66667	6.40177	2D-disc	False	53.7229
691.206	0.687831	12.5203	151	4	2.64901	2D-disc	False	53.8238
434.985	0.514135	10.5446	151	2.66667	1.766	2D-disc	False	53.8412
452.522	0.244538	23.0916	151	5	3.31126	2D-disc	False	53.907
154.821	0.023858	81.3179	151	36	23.8411	2D-disc	False	54.1346
685.294	0.151633	56.6848	151	8	5.29801	2D-disc	False	54.1835
657.91	0.105475	78.2406	151	11.3333	7.50552	2D-disc	False	54.1875
334.299	0.033292	126.008	151	12.6667	8.38852	2D-disc	False	54.2111
480.416	0.323802	18.6365	151	7.33333	4.85651	2D-disc	False	54.2639
585.554	0.184309	39.9475	151	9	5.96026	2D-disc	False	54.3191
583.419	0.209498	35.0204	151	11.6667	7.72627	2D-disc	False	54.3255
322.592	0.286754	14.1541	151	4.66667	3.09051	2D-disc	False	54.3527
584.24	0.643758	11.4476	151	7	4.63576	2D-disc	False	54.4916
521.511	0.339888	19.3729	151	3	1.98676	2D-disc	False	54.5445
211.395	0.043112	62.173	151	11.3333	7.50552	2D-disc	False	54.7759
271.745	0.023587	146.082	151	24	15.894	2D-disc	False	54.7763
673.363	0.179488	47.5989	151	14	9.27152	2D-disc	False	54.811
728.302	0.759769	12.1672	151	8.33333	5.51876	2D-disc	False	54.8334
245.945	0.468103	6.6754	151	17.3333	11.479	2D-disc	False	54.8865
351.122	0.062843	71.1336	151	4.66667	3.09051	2D-disc	False	54.9993
647.39	0.23639	34.8702	151	11	7.28477	2D-disc	False	55.0049
588.108	0.159751	46.9467	151	5.66667	3.75276	2D-disc	False	55.0903
799.749	0.735256	13.88	151	13	8.60927	2D-disc	False	55.1264
571.02	0.271804	26.8117	151	3	1.98676	2D-disc	False	55.1331
487.982	0.1894	32.9272	151	3	1.98676	2D-disc	False	55.2096
413.324	0.435445	12.1315	151	9.33333	6.18102	2D-disc	False	55.2128
739.675	0.278875	33.9232	151	2.66667	1.766	2D-disc	False	55.2523
698.859	0.439411	20.3481	151	10.6667	7.06402	2D-disc	False	55.2699
402.37	0.522543	9.8645	151	6.33333	4.19426	2D-disc	False	55.3421
596.597	0.32972	23.1834	151	3	1.98676	2D-disc	False	55.351
699.046	0.080716	111.274	151	11	7.28477	2D-disc	False	55.505
233.134	0.082993	36.0994	151	9.66667	6.40177	2D-disc	False	55.516
488.549	0.21458	29.2742	151	4	2.64901	2D-disc	False	55.5457
451.242	0.110695	52.4218	151	2.33333	1.54525	2D-disc	False	55.5538
443.682	0.080418	70.9609	151	7	4.63576	2D-disc	False	55.5628
673.216	0.071293	121.564	151	9	5.96026	2D-disc	False	55.6135
538.337	0.112013	61.9266	151	6.66667	4.41501	2D-disc	False	55.6641
639.067	0.490271	16.8078	151	4.66667	3.09051	2D-disc	False	55.7038
664.849	0.827142	10.3702	151	8.33333	5.51876	2D-disc	False	55.7349
496.694	0.058228	110.074	151	3.33333	2.20751	2D-disc	False	55.7456
359.388	0.029039	159.749	151	14.6667	9.71302	2D-disc	False	55.7623
683.835	0.953816	9.2621	151	7	4.63576	2D-disc	False	55.8093
293.068	0.125304	30.2224	151	2.33333	1.54525	2D-disc	False	55.8225
685.091	0.063739	139.03	151	11.3333	7.50552	2D-disc	False	55.879
361.637	0.856157	5.467	151	14.3333	9.49227	2D-disc	False	55.9131
235.094	0.020508	148.587	151	23	15.2318	2D-disc	False	55.9944
629.243	0.326445	24.9951	151	2	1.3245	2D-disc	False	56.0183
613.062	0.229478	34.644	151	8.66667	5.73951	2D-disc	False	56.0207
319.427	0.032269	128.498	151	12.6667	8.38852	2D-disc	False	56.0782
612.001	0.166977	47.8422	151	6	3.97351	2D-disc	False	56.3897
798.576	0.704805	14.8197	151	19.6667	13.0243	2D-disc	False	56.5036
662.47	0.127484	68.0012	151	9.66667	6.40177	2D-disc	False	56.5315
592.665	0.124619	62.2393	151	4	2.64901	2D-disc	False	56.5359
575.098	0.320108	23.5125	151	1.66667	1.10375	2D-disc	False	56.5376
414.104	0.184752	29.34	151	3.33333	2.20751	2D-disc	False	56.5488
651.038	0.058976	144.827	151	5.33333	3.53201	2D-disc	False	56.6765
161.472	0.025483	83.1708	151	39	25.8278	2D-disc	False	56.7033
655.674	0.501442	17.1776	151	11.3333	7.50552	2D-disc	False	56.7518
400.255	0.354789	14.8209	151	5.66667	3.75276	2D-disc	False	56.7533
626.858	0.088954	92.5832	151	4.66667	3.09051	2D-disc	False	56.7561
359.823	0.264566	17.8888	151	2.66667	1.766	2D-disc	False	56.821
561.576	0.286775	25.7646	151	5.33333	3.53201	2D-disc	False	56.8381
477.481	0.073483	85.9138	151	7.66667	5.07726	2D-disc	False	57.1186
171.909	0.1573	14.4716	151	33.3333	22.0751	2D-disc	False	57.2043
768.336	0.135129	75.31	151	17.3333	11.479	2D-disc	False	57.2181
282.797	0.254309	14.7332	151	6.66667	4.41501	2D-disc	False	57.2359
691.774	0.131268	69.8615	151	7	4.63576	2D-disc	False	57.2685
745.778	0.397705	24.8621	151	3.33333	2.20751	2D-disc	False	57.276
454.481	0.074348	81.0522	151	2.33333	1.54525	2D-disc	False	57.28
307.219	0.275069	14.8233	151	7.33333	4.85651	2D-disc	False	57.3353
587.039	0.415974	18.7317	151	9	5.96026	2D-disc	False	57.3403
792.535	0.656717	16.0191	151	27.3333	18.1015	2D-disc	False	57.3431
642.683	0.216243	39.4584	151	4	2.64901	2D-disc	False	57.3545
669.739	0.185199	48.0323	151	8.66667	5.73951	2D-disc	False	57.3787
720.305	0.291404	32.8581	151	7	4.63576	2D-disc	False	57.4256
335.344	0.456226	9.77201	151	10	6.62252	2D-disc	False	57.4324
570.86	0.974755	7.78949	151	6.66667	4.41501	2D-disc	False	57.4591
268.232	0.104054	34.2992	151	6.66667	4.41501	2D-disc	False	57.4799
579.935	0.143486	53.7968	151	2.66667	1.766	2D-disc	False	57.5003
703.413	0.114382	82.1137	151	6.33333	4.19426	2D-disc	False	57.6829
408.21	0.595799	9.14864	151	5	3.31126	2D-disc	False	57.6841
649.452	0.304559	28.4996	151	11.3333	7.50552	2D-disc	False	57.7361
614.377	0.079885	102.922	151	2.33333	1.54525	2D-disc	False	57.8126
512.59	0.11088	61.8778	151	4	2.64901	2D-disc	False	57.8232
602.823	0.643817	12.5431	151	2.33333	1.54525	2D-disc	False	57.871
401.914	0.201376	26.745	151	5.66667	3.75276	2D-disc	False	57.8896
624.031	0.353964	23.6263	151	4.33333	2.86976	2D-disc	False	57.8939
746.273	0.137232	73.1028	151	11.3333	7.50552	2D-disc	False	58.0731
556.179	0.471582	15.8684	151	2	1.3245	2D-disc	False	58.1244
547.712	0.176198	41.8294	151	2.66667	1.766	2D-disc	False	58.1319
639.775	0.974632	8.83685	151	5.66667	3.75276	2D-disc	False	58.156
398.582	0.209772	25.5921	151	2	1.3245	2D-disc	False	58.1861
700.44	0.342369	27.5797	151	9	5.96026	2D-disc	False	58.2367
491.072	0.261036	25.3821	151	4.33333	2.86976	2D-disc	False	58.2862
645.711	0.098829	88.1795	151	8.66667	5.73951	2D-disc	False	58.3039
277.065	0.219224	17.0755	151	8.33333	5.51876	2D-disc	False	58.3665
692.859	0.239219	39.1806	151	8	5.29801	2D-disc	False	58.4394
686.05	0.276935	33.5367	151	6.33333	4.19426	2D-disc	False	58.4824
732.471	0.126626	78.3131	151	2	1.3245	2D-disc	False	58.4858
738.065	0.112764	88.6992	151	12.6667	8.38852	2D-disc	False	58.5436
452.171	0.920041	6.66322	151	4.66667	3.09051	2D-disc	False	58.5696
632.273	0.070261	122.049	151	5.66667	3.75276	2D-disc	False	58.5906
500.393	0.090056	75.423	151	5.33333	3.53201	2D-disc	False	58.6393
541.573	0.073933	99.5589	151	8.33333	5.51876	2D-disc	False	58.7145
399.784	0.134591	40.4414	151	2.33333	1.54525	2D-disc	False	58.8167
181.54	0.480928	5.14963	151	123.333	81.6777	2D-disc	False	58.9342
560.074	0.153277	50.0026	151	2.33333	1.54525	2D-disc	False	59.1163
626.902	0.229436	37.458	151	6	3.97351	2D-disc	False	59.2229
643.171	0.254563	34.6796	151	2.33333	1.54525	2D-disc	False	59.2961
443.487	0.085619	71.1413	151	3	1.98676	2D-disc	False	59.3328
620.64	0.258281	33.022	151	3.66667	2.42826	2D-disc	False	59.3662
690.147	0.309644	30.6675	151	10.6667	7.06402	2D-disc	False	59.4407
538.455	0.325119	22.802	151	6	3.97351	2D-disc	False	59.4772
606.355	0.064577	129.425	151	3.33333	2.20751	2D-disc	False	59.5462
613.121	0.103338	81.7904	151	12.6667	8.38852	2D-disc	False	59.5525
470.185	0.048532	133.665	151	7	4.63576	2D-disc	False	59.6019
613.2	0.236655	35.7715	151	3.33333	2.20751	2D-disc	False	59.6396
775.856	0.964338	11.1124	151	9.66667	6.40177	2D-disc	False	59.6679
664.835	0.131074	70.0949	151	10.6667	7.06402	2D-disc	False	59.6998
704.528	0.133606	72.9609	151	6	3.97351	2D-disc	False	59.7726
570.031	0.344522	22.9138	151	5	3.31126	2D-disc	False	59.8273
575.325	0.31181	25.5677	151	12.3333	8.16777	2D-disc	False	59.8622
670.923	0.289947	32.0767	151	9.66667	6.40177	2D-disc	False	59.8853
533.406	0.281197	26.301	151	6	3.97351	2D-disc	False	59.8974
441.593	0.606554	10.1096	151	2.66667	1.766	2D-disc	False	59.9884
279.686	0.049317	78.7637	151	6.66667	4.41501	2D-disc	False	59.9979
702.335	0.405065	24.1069	151	6.66667	4.41501	2D-disc	False	60.0628
406.882	0.84489	6.69588	151	10.3333	6.84327	2D-disc	False	60.0652
729.017	0.349507	29.0027	151	6	3.97351	2D-disc	False	60.0675
749.218	0.113066	92.2103	151	15	9.93378	2D-disc	False	60.1156
663.404	0.342533	26.9766	151	13	8.60927	2D-disc	False	60.1722
241.449	0.256427	13.1212	151	10.6667	7.06402	2D-disc	False	60.1997
763.374	0.446189	23.8427	151	13.6667	9.05077	2D-disc	False	60.2034
680.566	0.062229	152.603	151	13.3333	8.83002	2D-disc	False	60.2795
720.661	0.533856	18.8544	151	9.66667	6.40177	2D-disc	False	60.3379
543.404	0.05867	129.382	151	11.6667	7.72627	2D-disc	False	60.3464
668.327	0.500242	18.667	151	11.3333	7.50552	2D-disc	False	60.36
549.921	0.143189	53.6982	151	3.66667	2.42826	2D-disc	False	60.4022
586.341	0.522467	15.7008	151	13	8.60927	2D-disc	False	60.4386
189.071	0.020546	128.746	151	41	27.1523	2D-disc	False	60.4394
781.73	0.131451	83.2026	151	8.33333	5.51876	2D-disc	False	60.4404
532.112	0.101879	73.1998	151	6.66667	4.41501	2D-disc	False	60.5446
468.501	0.162718	40.4893	151	6.66667	4.41501	2D-disc	False	60.7504
417.377	0.627316	9.36089	151	2.33333	1.54525	2D-disc	False	60.7798
341.116	0.272229	17.6917	151	2	1.3245	2D-disc	False	60.9938
513.687	0.068775	105.834	151	7	4.63576	2D-disc	False	61.2126
169.388	0.348343	6.89048	151	120.667	79.9117	2D-disc	False	61.2152
164.432	0.019714	118.263	151	56.6667	37.5276	2D-disc	False	61.2521
486.083	0.044028	156.61	151	7.66667	5.07726	2D-disc	False	61.2805
732.25	0.170544	60.914	151	9.33333	6.18102	2D-disc	False	61.2884
757.472	0.168761	63.6806	151	10.3333	6.84327	2D-disc	False	61.2909
770.462	0.458947	23.8514	151	12.3333	8.16777	2D-disc	False	61.3775
381.19	0.140391	38.6069	151	6	3.97351	2D-disc	False	61.4253
702.301	0.397196	25.197	151	2	1.3245	2D-disc	False	61.5622
623.896	0.235904	37.7012	151	2.33333	1.54525	2D-disc	False	61.5831
691.072	0.318897	30.9172	151	3.33333	2.20751	2D-disc	False	61.6327
564.743	0.399964	20.1481	151	1.66667	1.10375	2D-disc	False	61.6437
493.442	0.06166	114.24	151	4	2.64901	2D-disc	False	61.6692
698.797	0.103836	96.2235	151	22.6667	15.011	2D-disc	False	61.7677
766.321	0.080199	136.694	151	18.6667	12.362	2D-disc	False	61.8005
631.597	0.284675	31.7512	151	6.66667	4.41501	2D-disc	False	61.8234
630.296	0.421621	21.3989	151	9	5.96026	2D-disc	False	61.8375
423.745	0.110473	54.9307	151	5.66667	3.75276	2D-disc	False	61.8657
545.357	0.082244	95.0514	151	6.66667	4.41501	2D-disc	False	61.925
230.231	0.144685	22.8508	151	14.3333	9.49227	2D-disc	False	62.0362
379.687	0.113489	48.0781	151	6.33333	4.19426	2D-disc	False	62.081
371.19	0.04086	130.626	151	1.66667	1.10375	2D-disc	False	62.1176
157.426	0.021994	102.937	151	56.3333	37.3068	2D-disc	False	62.1276
427.251	0.094499	65.0885	151	11	7.28477	2D-disc	False	62.1916
157.818	0.154667	14.6951	151	42.6667	28.2561	2D-disc	False	62.2154
504.484	0.06161	118.052	151	8.33333	5.51876	2D-disc	False	62.2819
350.801	0.289238	17.49	151	4.66667	3.09051	2D-disc	False	62.2972
594.622	0.059434	144.29	151	12.3333	8.16777	2D-disc	False	62.3037
545.756	0.264472	29.8021	151	2	1.3245	2D-disc	False	62.3895
677.86	0.328411	29.8631	151	7	4.63576	2D-disc	False	62.5022
641.429	0.738083	12.597	151	5.66667	3.75276	2D-disc	False	62.6192
610.161	0.58809	15.0637	151	5.66667	3.75276	2D-disc	False	62.7213
477.581	0.428152	16.2125	151	3.66667	2.42826	2D-disc	False	62.7892
616.525	0.706974	12.6762	151	5.66667	3.75276	2D-disc	False	62.7953
515.944	0.182779	41.0387	151	5.66667	3.75276	2D-disc	False	62.806
473.438	0.158412	43.4563	151	4.33333	2.86976	2D-disc	False	62.8148
672.576	0.958481	10.2084	151	11.3333	7.50552	2D-disc	False	62.8469
519.259	0.075623	99.9313	151	3.33333	2.20751	2D-disc	False	62.8717
368.015	0.248848	21.5244	151	5.33333	3.53201	2D-disc	False	62.8756
670.764	0.066163	147.69	151	19.6667	13.0243	2D-disc	False	62.9332
450.456	0.524773	12.5109	151	2.66667	1.766	2D-disc	False	62.9638
659.061	0.166376	57.7545	151	9.66667	6.40177	2D-disc	False	62.9847
321.48	0.06189	75.7532	151	13.6667	9.05077	2D-disc	False	63.0016
470.334	0.22446	30.5692	151	2	1.3245	2D-disc	False	63.0231
360.162	0.066802	78.6693	151	7	4.63576	2D-disc	False	63.0349
730.132	0.176035	60.5369	151	11	7.28477	2D-disc	False	63.0524
392.872	0.227556	25.214	151	2.66667	1.766	2D-disc	False	63.0904
763.665	0.460859	24.2509	151	17.3333	11.479	2D-disc	False	63.2232
623.677	0.216488	42.1663	151	8.33333	5.51876	2D-disc	False	63.23
524.049	0.131856	58.1946	151	6.66667	4.41501	2D-disc	False	63.2549
762.312	0.96129	11.6168	151	8	5.29801	2D-disc	False	63.2838
418.625	0.086504	70.9899	151	9.33333	6.18102	2D-disc	False	63.3711
288.204	0.037603	112.517	151	10	6.62252	2D-disc	False	63.4195
174.387	0.074087	34.566	151	18.3333	12.1413	2D-disc	False	63.4395
359.679	0.22942	23.0464	151	7	4.63576	2D-disc	False	63.5042
340.131	0.112554	44.4856	151	4	2.64901	2D-disc	False	63.5942
378.569	0.126987	43.9128	151	6.66667	4.41501	2D-disc	False	63.634
789.827	0.366336	31.7825	151	14.6667	9.71302	2D-disc	False	63.6824
374.028	0.089054	61.93	151	4.66667	3.09051	2D-disc	False	63.6993
606.247	0.192533	46.4354	151	8	5.29801	2D-disc	False	63.7071
619.579	0.081347	112.324	151	7.66667	5.07726	2D-disc	False	63.709
646.487	0.216375	44.0677	151	5.33333	3.53201	2D-disc	False	63.7164
314.279	0.107101	43.3198	151	6.66667	4.41501	2D-disc	False	63.7747
291.146	0.347486	12.3702	151	14.3333	9.49227	2D-disc	False	63.7805
361.646	0.08446	63.231	151	4	2.64901	2D-disc	False	63.7941
789.453	0.153774	75.9227	151	19	12.5828	2D-disc	False	63.8869
639.424	0.612246	15.4777	151	6.33333	4.19426	2D-disc	False	64.0216
636.537	0.373943	25.2809	151	4.33333	2.86976	2D-disc	False	64.1592
685.41	0.84882	12.0081	151	10.6667	7.06402	2D-disc	False	64.2428
724.919	0.309236	34.9027	151	8.33333	5.51876	2D-disc	False	64.3196
678.689	0.782437	12.9244	151	7	4.63576	2D-disc	False	64.3683
635.093	0.495753	19.1026	151	7.66667	5.07726	2D-disc	False	64.4174
794.194	0.353584	33.5156	151	18.6667	12.362	2D-disc	False	64.4609
360.033	0.085576	62.8859	151	8	5.29801	2D-disc	False	64.5723
405.352	0.070743	85.6837	151	3.33333	2.20751	2D-disc	False	64.6002
170.891	0.016096	158.973	151	184	121.854	2D-disc	False	64.6857
206.149	0.07701	40.1152	151	14.3333	9.49227	2D-disc	False	64.738
440.158	0.059732	110.439	151	5.33333	3.53201	2D-disc	False	64.7445
728.025	0.140475	77.7344	151	9.66667	6.40177	2D-disc	False	64.7963
653.637	0.428224	22.8982	151	5.33333	3.53201	2D-disc	False	64.8066
747.007	0.083864	133.655	151	6	3.97351	2D-disc	False	64.8217
529.394	0.2129	37.314	151	6.66667	4.41501	2D-disc	False	64.8264
582.471	0.1037	84.3435	151	1.66667	1.10375	2D-disc	False	64.8694
253.849	0.035232	108.196	151	22	14.5695	2D-disc	False	64.8722
706.265	0.112372	94.5916	151	14	9.27152	2D-disc	False	65.017
605.521	0.136821	66.625	151	3	1.98676	2D-disc	False	65.0346
704.199	0.93746	11.311	151	7	4.63576	2D-disc	False	65.0493
476.321	0.140661	51.0793	151	4.66667	3.09051	2D-disc	False	65.1632
762.981	0.944546	12.1976	151	19.6667	13.0243	2D-disc	False	65.233
614.199	0.070864	131.099	151	10.3333	6.84327	2D-disc	False	65.343
746.028	0.534364	21.1255	151	5.33333	3.53201	2D-disc	False	65.3692
636.162	0.209108	46.0705	151	3	1.98676	2D-disc	False	65.4199
356.196	0.054204	99.6526	151	9.33333	6.18102	2D-disc	False	65.5111
460.643	0.145342	48.0689	151	1.66667	1.10375	2D-disc	False	65.5201
646.947	0.275998	35.5618	151	4.66667	3.09051	2D-disc	False	65.5397
444.977	0.224351	30.1032	151	4.66667	3.09051	2D-disc	False	65.5671
619.86	0.682646	13.7999	151	6	3.97351	2D-disc	False	65.6542
331.185	0.180662	27.8874	151	2.33333	1.54525	2D-disc	False	65.7184
477.67	0.405557	17.9231	151	2	1.3245	2D-disc	False	65.7387
587.724	0.100349	89.1565	151	8.33333	5.51876	2D-disc	False	65.7621
317.944	0.102625	47.2064	151	6	3.97351	2D-disc	False	65.8246
537.026	0.076607	106.836	151	9.66667	6.40177	2D-disc	False	65.8376
763.245	0.248402	46.8696	151	8.66667	5.73951	2D-disc	False	65.8971
791.903	0.377731	32.0759	151	17.6667	11.6998	2D-disc	False	66.0958
420.746	0.200835	32.108	151	5.66667	3.75276	2D-disc	False	66.2089
483.449	0.08745	84.743	151	4	2.64901	2D-disc	False	66.2211
281.388	0.094303	45.8374	151	5.66667	3.75276	2D-disc	False	66.3628
756.689	0.186986	62.2762	151	18.3333	12.1413	2D-disc	False	66.481
324.178	0.355651	14.0303	151	8.33333	5.51876	2D-disc	False	66.4951
435.471	0.242626	27.6388	151	3.66667	2.42826	2D-disc	False	66.5244
416.677	0.911153	7.05163	151	6	3.97351	2D-disc	False	66.6139
559.317	0.723558	11.9274	151	5.66667	3.75276	2D-disc	False	66.6568
798.631	0.092541	133.164	151	20.6667	13.6865	2D-disc	False	66.6587
632.778	0.846577	11.5371	151	3.33333	2.20751	2D-disc	False	66.6802
630.332	0.094244	103.269	151	8.33333	5.51876	2D-disc	False	66.7019
381.597	0.64432	9.14579	151	4.33333	2.86976	2D-disc	False	66.7117
320.519	0.69955	7.07683	151	10	6.62252	2D-disc	False	66.7248
222.173	0.488831	7.02334	151	40.6667	26.9316	2D-disc	False	66.7566
404.181	0.066619	93.7964	151	4.33333	2.86976	2D-disc	False	66.787
506.205	0.586536	13.3532	151	4.33333	2.86976	2D-disc	False	66.8399
678.762	0.786098	13.3838	151	15.3333	10.1545	2D-disc	False	66.961
441.266	0.074511	91.8255	151	3.33333	2.20751	2D-disc	False	66.9833
358.723	0.417446	13.3316	151	6.66667	4.41501	2D-disc	False	67.0202
649.17	0.897516	11.2279	151	7.66667	5.07726	2D-disc	False	67.0601
792.453	0.084464	145.734	151	21.6667	14.3488	2D-disc	False	67.103
458.598	0.351449	20.291	151	8	5.29801	2D-disc	False	67.1765
618.496	0.072534	132.601	151	3.33333	2.20751	2D-disc	False	67.179
559.426	0.620812	14.02	151	3.33333	2.20751	2D-disc	False	67.2122
754.824	0.315143	37.2678	151	6.66667	4.41501	2D-disc	False	67.217
387.808	0.402534	15.0236	151	8	5.29801	2D-disc	False	67.3666
581.796	0.061631	147.411	151	12.6667	8.38852	2D-disc	False	67.4592
692.871	0.266421	40.6135	151	5.66667	3.75276	2D-disc	False	67.4636
214.94	0.026137	128.435	151	50.3333	33.3333	2D-disc	False	67.4694
509.216	0.252817	31.5179	151	10.6667	7.06402	2D-disc	False	67.5998
722.279	0.529089	21.3972	151	10.3333	6.84327	2D-disc	False	67.7118
744.793	0.44853	26.0277	151	3.66667	2.42826	2D-disc	False	67.7134
331.702	0.234316	22.1907	151	5.33333	3.53201	2D-disc	False	67.7186
728.226	0.080533	142.133	151	7.66667	5.07726	2D-disc	False	67.9025
572.787	0.242267	37.1768	151	6.66667	4.41501	2D-disc	False	67.9291
319.777	0.036175	139.058	151	27.3333	18.1015	2D-disc	False	67.9582
480.122	0.734974	10.2775	151	2	1.3245	2D-disc	False	67.9658
768.377	0.296793	40.7685	151	23	15.2318	2D-disc	False	68.028
629.328	0.153391	64.641	151	3	1.98676	2D-disc	False	68.0636
733.28	0.370332	31.227	151	8	5.29801	2D-disc	False	68.1297
777.316	0.564448	21.736	151	11	7.28477	2D-disc	False	68.1853
303.993	0.143167	33.5567	151	6.33333	4.19426	2D-disc	False	68.2719
342.735	0.251936	21.5341	151	6	3.97351	2D-disc	False	68.3821
661.034	0.095381	109.713	151	12.3333	8.16777	2D-disc	False	68.3878
609.349	0.991313	9.73402	151	12.3333	8.16777	2D-disc	False	68.4102
689.574	0.1029	106.15	151	16.6667	11.0375	2D-disc	False	68.4289
386.981	0.083926	73.0593	151	10.6667	7.06402	2D-disc	False	68.4489
562.599	0.529465	16.8462	151	2.33333	1.54525	2D-disc	False	68.4894
630.846	0.430035	23.2652	151	4.66667	3.09051	2D-disc	False	68.5127
473.389	0.897922	8.36126	151	10.6667	7.06402	2D-disc	False	68.5135
367.706	0.402936	14.5098	151	1.66667	1.10375	2D-disc	False	68.6879
161.974	0.058768	43.9102	151	43.6667	28.9183	2D-disc	False	68.8247
755.763	0.126566	95.1544	151	9.66667	6.40177	2D-disc	False	68.8405
553.182	0.061001	144.657	151	4.66667	3.09051	2D-disc	False	68.9114
788.752	0.359117	35.0384	151	8	5.29801	2D-disc	False	68.9165
329.456	0.054386	96.6942	151	8	5.29801	2D-disc	False	68.9562
671.689	0.453678	23.6382	151	7.66667	5.07726	2D-disc	False	68.9727
374.379	0.777183	7.70118	151	2.66667	1.766	2D-disc	False	69.0642
223.129	0.108174	32.9929	151	21.6667	14.3488	2D-disc	False	69.0988
623.738	0.374772	26.6381	151	4.66667	3.09051	2D-disc	False	69.1435
737.692	0.572576	20.6418	151	8	5.29801	2D-disc	False	69.2133
196.153	0.024797	126.805	151	66.3333	43.9294	2D-disc	False	69.2509
375.077	0.132494	45.4878	151	5.33333	3.53201	2D-disc	False	69.415
705.038	0.159367	71.1742	151	12.6667	8.38852	2D-disc	False	69.5012
485.519	0.186061	42.0012	151	3.66667	2.42826	2D-disc	False	69.5337
735.672	0.901211	13.1472	151	12.3333	8.16777	2D-disc	False	69.5757
359.688	0.067546	85.78	151	6	3.97351	2D-disc	False	69.5895
766.957	0.157653	78.4731	151	15	9.93378	2D-disc	False	69.6845
751.852	0.353425	34.3859	151	6.66667	4.41501	2D-disc	False	69.8278
351.52	0.332701	17.0837	151	7.66667	5.07726	2D-disc	False	69.8503
514.059	0.287876	28.8877	151	6.66667	4.41501	2D-disc	False	69.8858
186.111	0.226706	13.2817	151	43.3333	28.6976	2D-disc	False	69.8921
427.178	0.445614	15.5414	151	3.33333	2.20751	2D-disc	False	70.0365
542.01	0.432761	20.3444	151	5.66667	3.75276	2D-disc	False	70.1728
163.679	0.220394	12.1065	151	83.3333	55.1876	2D-disc	False	70.4223
560.132	0.060553	150.876	151	13.3333	8.83002	2D-disc	False	70.4612
586.324	0.27432	34.8806	151	6.66667	4.41501	2D-disc	False	70.4998
685.363	0.091278	122.647	151	13.3333	8.83002	2D-disc	False	70.5644
484.801	0.439969	18.0008	151	3.66667	2.42826	2D-disc	False	70.5722
342.251	0.235615	23.74	151	4.66667	3.09051	2D-disc	False	70.6031
262.147	0.14544	29.5024	151	5.33333	3.53201	2D-disc	False	70.7097
569.68	0.909612	10.2567	151	7.66667	5.07726	2D-disc	False	70.7483
735.983	0.129983	92.7659	151	9	5.96026	2D-disc	False	70.7768
799.593	0.188574	69.5125	151	22	14.5695	2D-disc	False	70.8206
450.171	0.388652	19.0077	151	6.66667	4.41501	2D-disc	False	70.892
537.837	0.080344	109.932	151	10.3333	6.84327	2D-disc	False	70.943
406.554	0.155213	43.0182	151	2.33333	1.54525	2D-disc	False	70.9489
735.418	0.640041	18.8841	151	7.33333	4.85651	2D-disc	False	70.9991
696.339	0.794173	14.4403	151	2.66667	1.766	2D-disc	False	71.1467
190.223	0.271841	11.5397	151	28	18.543	2D-disc	False	71.2407
738.828	0.627734	19.4311	151	3.33333	2.20751	2D-disc	False	71.3205
274.954	0.168719	26.9047	151	11	7.28477	2D-disc	False	71.3207
774.277	0.198876	64.3163	151	17.6667	11.6998	2D-disc	False	71.3659
297.434	0.128135	38.3578	151	2.33333	1.54525	2D-disc	False	71.3863
492.575	0.389049	20.9367	151	4.33333	2.86976	2D-disc	False	71.4372
755.215	0.330185	37.8234	151	14.6667	9.71302	2D-disc	False	71.4383
705.666	0.085671	136.231	151	7.66667	5.07726	2D-disc	False	71.4488
369.306	0.039238	155.735	151	17.3333	11.479	2D-disc	False	71.4811
775.512	0.847692	15.1393	151	8	5.29801	2D-disc	False	71.4891
701.982	0.689218	16.8558	151	9.33333	6.18102	2D-disc	False	71.4929
792.014	0.142268	92.161	151	14	9.27152	2D-disc	False	71.5163
393.062	0.756174	8.62082	151	5.66667	3.75276	2D-disc	False	71.6461
486.004	0.338457	23.8193	151	3.66667	2.42826	2D-disc	False	71.66
395.434	0.070895	92.5538	151	5.66667	3.75276	2D-disc	False	71.6835
689.932	0.091596	125.002	151	11.3333	7.50552	2D-disc	False	71.6918
176.71	0.019813	148.052	151	213.667	141.501	2D-disc	False	71.7112
799.131	0.10628	124.874	151	17	11.2583	2D-disc	False	71.7444
340.642	0.046322	122.264	151	15	9.93378	2D-disc	False	71.8242
713.026	0.109527	108.477	151	7	4.63576	2D-disc	False	71.9839
628.425	0.131433	79.7201	151	2.66667	1.766	2D-disc	False	72.0282
266.676	0.077536	57.3953	151	9.66667	6.40177	2D-disc	False	72.0907
568.555	0.691944	13.7145	151	6.33333	4.19426	2D-disc	False	72.1046
571.998	0.536899	17.7917	151	7	4.63576	2D-disc	False	72.1438
430.243	0.90621	7.93288	151	4	2.64901	2D-disc	False	72.1821
725.489	0.773896	15.6681	151	10.6667	7.06402	2D-disc	False	72.2024
591.248	0.242708	40.7653	151	8.66667	5.73951	2D-disc	False	72.2918
523.724	0.077054	113.749	151	4.66667	3.09051	2D-disc	False	72.2979
383.539	0.455765	14.0858	151	9.33333	6.18102	2D-disc	False	72.3098
640.71	0.749481	14.3118	151	4	2.64901	2D-disc	False	72.3232
278.344	0.203041	22.9879	151	9.66667	6.40177	2D-disc	False	72.4413
757.34	0.151311	84.0117	151	10.6667	7.06402	2D-disc	False	72.5109
788.072	0.540374	24.4905	151	13.3333	8.83002	2D-disc	False	72.5456
670.487	0.449168	25.0732	151	5.33333	3.53201	2D-disc	False	72.5623
574.813	0.849169	11.3743	151	8.66667	5.73951	2D-disc	False	72.59
657.7	0.333318	33.1591	151	7.66667	5.07726	2D-disc	False	72.5967
624.425	0.086164	121.892	151	7.33333	4.85651	2D-disc	False	72.6617
184.86	0.074332	41.8303	151	19	12.5828	2D-disc	False	72.6622
736.038	0.281727	43.9557	151	9	5.96026	2D-disc	False	72.682
394.231	0.473145	14.0208	151	7.33333	4.85651	2D-disc	False	72.6942
735.708	0.540667	22.9149	151	8.66667	5.73951	2D-disc	False	72.7489
573.106	0.480574	20.1137	151	9	5.96026	2D-disc	False	72.862
672.591	0.840134	13.5078	151	8.66667	5.73951	2D-disc	False	72.8898
787.939	0.340301	39.0777	151	20.3333	13.4658	2D-disc	False	72.9093
750.588	0.791609	16.0104	151	7.66667	5.07726	2D-disc	False	72.9449
627.561	0.317057	33.4277	151	5.33333	3.53201	2D-disc	False	72.9578
569.239	0.567207	16.956	151	4.33333	2.86976	2D-disc	False	72.9884
742.1	0.381286	32.8913	151	8.66667	5.73951	2D-disc	False	73.0051
579.441	0.082068	119.42	151	11.6667	7.72627	2D-disc	False	73.0677
392.296	0.233422	28.4349	151	4	2.64901	2D-disc	False	73.0909
437.704	0.985176	7.51883	151	3.66667	2.42826	2D-disc	False	73.1085
563.592	0.553707	17.2333	151	4	2.64901	2D-disc	False	73.142
275.093	0.536829	8.67725	151	10.6667	7.06402	2D-disc	False	73.1514
707.868	0.56519	21.2085	151	15.3333	10.1545	2D-disc	False	73.1534
399.404	0.466376	14.5265	151	3.66667	2.42826	2D-disc	False	73.277
424.498	0.120895	59.5863	151	3.66667	2.42826	2D-disc	False	73.3098
664.875	0.908681	12.4253	151	13.6667	9.05077	2D-disc	False	73.3607
722.116	0.489814	25.0369	151	5.66667	3.75276	2D-disc	False	73.3649
390.292	0.420677	15.7686	151	2.66667	1.766	2D-disc	False	73.4237
648.441	0.186383	59.1467	151	6	3.97351	2D-disc	False	73.443
458.124	0.359644	21.6565	151	9.66667	6.40177	2D-disc	False	73.4448
789.517	0.18657	71.9445	151	16	10.596	2D-disc	False	73.4449
656.307	0.667642	16.7216	151	17.6667	11.6998	2D-disc	False	73.4849
535.765	0.174754	52.2136	151	2	1.3245	2D-disc	False	73.5732
694.536	0.200853	58.9015	151	14.6667	9.71302	2D-disc	False	73.5857
604.841	0.308808	33.3652	151	6.33333	4.19426	2D-disc	False	73.5911
469.038	0.089544	89.2939	151	2.66667	1.766	2D-disc	False	73.6434
743.471	0.962282	13.1777	151	7.33333	4.85651	2D-disc	False	73.682
630.805	0.222884	48.2802	151	6.66667	4.41501	2D-disc	False	73.6948
512.967	0.090389	96.8396	151	11.3333	7.50552	2D-disc	False	73.7162
783.539	0.585997	22.8212	151	16.3333	10.8168	2D-disc	False	73.7321
667.305	0.090739	125.67	151	13.3333	8.83002	2D-disc	False	73.822
668.94	0.381405	29.9937	151	6.66667	4.41501	2D-disc	False	73.8776
388.696	0.400731	16.5934	151	2.66667	1.766	2D-disc	False	73.903
670.738	0.127886	89.7691	151	11	7.28477	2D-disc	False	73.9402
380.424	0.101967	63.8802	151	11	7.28477	2D-disc	False	73.9676
482.905	0.108071	76.5104	151	2.33333	1.54525	2D-disc	False	73.9693
533.967	0.286813	31.9242	151	4	2.64901	2D-disc	False	74.0778
314.043	0.924292	5.83927	151	8.33333	5.51876	2D-disc	False	74.2442
640.97	0.157192	70.1453	151	9	5.96026	2D-disc	False	74.3147
544.003	0.114324	81.9648	151	9.33333	6.18102	2D-disc	False	74.4127
270.015	0.063952	72.7767	151	14.3333	9.49227	2D-disc	False	74.4634
794.358	0.145135	94.3591	151	17	11.2583	2D-disc	False	74.4772
199.431	0.086299	39.8546	151	25.3333	16.777	2D-disc	False	74.5033
334.957	0.056382	102.531	151	8.66667	5.73951	2D-disc	False	74.5572
291.757	0.165202	30.5535	151	8.66667	5.73951	2D-disc	False	74.7374
233.537	0.295849	13.6628	151	15	9.93378	2D-disc	False	74.772
283.838	0.11885	41.3742	151	12	7.94702	2D-disc	False	74.8414
246.893	0.223683	19.1236	151	8.66667	5.73951	2D-disc	False	74.8474
745.371	0.245445	52.62	151	10	6.62252	2D-disc	False	74.8543
697.582	0.076885	157.411	151	16	10.596	2D-disc	False	74.9488
741.374	0.090573	142.028	151	12	7.94702	2D-disc	False	74.9584
525.629	0.217483	41.952	151	5	3.31126	2D-disc	False	74.9864
512.281	0.862972	10.3175	151	6.33333	4.19426	2D-disc	False	75.0839
480.005	0.68612	12.1598	151	6.33333	4.19426	2D-disc	False	75.0868
196.005	0.078183	43.6136	151	19	12.5828	2D-disc	False	75.154
638.47	0.832574	13.3671	151	4.66667	3.09051	2D-disc	False	75.3013
608.573	0.123118	86.3142	151	6.66667	4.41501	2D-disc	False	75.4354
531.726	0.157669	58.9004	151	3	1.98676	2D-disc	False	75.4502
559.747	0.163911	59.6782	151	4.33333	2.86976	2D-disc	False	75.4946
737.264	0.103218	124.933	151	13.3333	8.83002	2D-disc	False	75.5599
715.488	0.106607	117.396	151	13.3333	8.83002	2D-disc	False	75.5652
662.133	0.160089	72.3833	151	8	5.29801	2D-disc	False	75.603
441.791	0.297831	25.961	151	3	1.98676	2D-disc	False	75.6063
580.747	0.553518	18.364	151	4.66667	3.09051	2D-disc	False	75.6131
453.831	0.068691	115.676	151	7.33333	4.85651	2D-disc	False	75.6364
711.478	0.094236	132.254	151	12.3333	8.16777	2D-disc	False	75.6742
252.417	0.320789	13.7872	151	8.66667	5.73951	2D-disc	False	75.6942
290.011	0.184079	27.6084	151	10	6.62252	2D-disc	False	75.7034
536.005	0.164899	56.9895	151	2	1.3245	2D-disc	False	75.7405
577.316	0.179917	56.3064	151	7.33333	4.85651	2D-disc	False	75.8054
665.201	0.09951	117.346	151	9.33333	6.18102	2D-disc	False	75.8344
794.649	0.192341	72.5328	151	14.6667	9.71302	2D-disc	False	75.8429
678.745	0.121297	98.2914	151	9.33333	6.18102	2D-disc	False	75.8827
226.813	0.071334	55.8743	151	10.6667	7.06402	2D-disc	False	75.9144
703.703	0.746634	16.5674	151	4.33333	2.86976	2D-disc	False	75.9375
554.246	0.539201	18.0728	151	5.66667	3.75276	2D-disc	False	75.9552
686.857	0.694047	17.4026	151	9.66667	6.40177	2D-disc	False	75.966
699.875	0.0951	129.44	151	17.3333	11.479	2D-disc	False	75.9822
191.482	0.064702	52.0982	151	24.6667	16.3355	2D-disc	False	76.0496
593.073	0.732737	14.249	151	6.66667	4.41501	2D-disc	False	76.0515
653.006	0.216901	53.0192	151	6	3.97351	2D-disc	False	76.0783
174.955	0.064915	47.4829	151	34	22.5166	2D-disc	False	76.1095
308.588	0.055429	98.1217	151	9	5.96026	2D-disc	False	76.1388
738.294	0.220082	59.1374	151	7	4.63576	2D-disc	False	76.1556
182.998	0.084583	38.1683	151	42.3333	28.0353	2D-disc	False	76.2121
623.951	0.111392	98.839	151	4	2.64901	2D-disc	False	76.2282
639.779	0.115431	97.81	151	6	3.97351	2D-disc	False	76.2359
652.944	0.076976	149.73	151	14.3333	9.49227	2D-disc	False	76.2556
254.8	0.029378	153.182	151	59.6667	39.5143	2D-disc	False	76.2982
283.432	0.985296	5.08198	151	27.3333	18.1015	2D-disc	False	76.3194
705.993	0.292598	42.6296	151	12	7.94702	2D-disc	False	76.3248
386	0.074446	91.6731	151	7.66667	5.07726	2D-disc	False	76.3801
258.315	0.330261	13.8483	151	20.6667	13.6865	2D-disc	False	76.4869
725.24	0.402041	31.9636	151	3.66667	2.42826	2D-disc	False	76.5471
697.142	0.100273	123.276	151	4.66667	3.09051	2D-disc	False	76.5994
469.427	0.45673	18.2758	151	3.66667	2.42826	2D-disc	False	76.816
686.996	0.128679	94.9432	151	11	7.28477	2D-disc	False	76.8247
779.617	0.105846	131.02	151	18.6667	12.362	2D-disc	False	76.845
474.409	0.078088	108.078	151	13.3333	8.83002	2D-disc	False	76.8516
567.59	0.27788	36.3653	151	4	2.64901	2D-disc	False	76.9119
378.436	0.269236	25.0602	151	5	3.31126	2D-disc	False	77.021
766.862	0.720462	19.0277	151	19.3333	12.8035	2D-disc	False	77.2262
345.409	0.652213	9.47104	151	10.3333	6.84327	2D-disc	False	77.257
757.178	0.236421	57.3075	151	16	10.596	2D-disc	False	77.3007
602.119	0.365406	29.4916	151	9	5.96026	2D-disc	False	77.3171
774.387	0.870042	15.934	151	14.6667	9.71302	2D-disc	False	77.3377
533.154	0.061026	156.554	151	8.66667	5.73951	2D-disc	False	77.4125
742.702	0.857002	15.5828	151	1.66667	1.10375	2D-disc	False	77.6779
751.973	0.316655	42.718	151	10	6.62252	2D-disc	False	77.7103
678.614	0.994229	12.2822	151	9	5.96026	2D-disc	False	77.7362
719.067	0.325583	39.7678	151	7	4.63576	2D-disc	False	77.7872
524.384	0.704337	13.4101	151	5	3.31126	2D-disc	False	77.8123
696.724	0.504712	24.8657	151	10.3333	6.84327	2D-disc	False	77.8157
725.671	0.42042	31.1543	151	8.33333	5.51876	2D-disc	False	77.9732
702.237	0.083348	152.134	151	19	12.5828	2D-disc	False	78.0049
376.458	0.232999	29.1788	151	3	1.98676	2D-disc	False	78.0167
298.549	0.32955	16.4395	151	4.66667	3.09051	2D-disc	False	78.3932
717.204	0.365263	35.6481	151	8.66667	5.73951	2D-disc	False	78.4302
567.031	0.286063	36.0308	151	9.33333	6.18102	2D-disc	False	78.5259
561.054	0.334915	30.4981	151	2.66667	1.766	2D-disc	False	78.6478
571.836	0.123499	84.3272	151	7.66667	5.07726	2D-disc	False	78.6761
275.525	0.564995	8.88193	151	10.3333	6.84327	2D-disc	False	78.6819
317.393	0.089877	64.3936	151	9	5.96026	2D-disc	False	78.7731
445.633	0.058841	138.5	151	7.66667	5.07726	2D-disc	False	79.0014
726.76	0.627009	21.2347	151	6	3.97351	2D-disc	False	79.1429
498.111	0.328441	27.7903	151	3.33333	2.20751	2D-disc	False	79.1606
500.447	0.430928	21.285	151	6	3.97351	2D-disc	False	79.1778
465.346	0.214712	39.7474	151	8.66667	5.73951	2D-disc	False	79.227
323.384	0.043694	135.784	151	16.6667	11.0375	2D-disc	False	79.2564
754.543	0.246652	56.1316	151	16	10.596	2D-disc	False	79.2669
371.636	0.391616	17.4224	151	8	5.29801	2D-disc	False	79.3112
217.581	0.754653	5.3037	151	59.6667	39.5143	2D-disc	False	79.4676
238.683	0.578604	7.58889	151	24.3333	16.1148	2D-disc	False	79.4736
357.758	0.432578	15.216	151	5.33333	3.53201	2D-disc	False	79.4801
760.932	0.955849	14.6582	151	13.6667	9.05077	2D-disc	False	79.5443
617.066	0.076313	148.918	151	5.33333	3.53201	2D-disc	False	79.5604
210.427	0.571294	6.78771	151	77	50.9934	2D-disc	False	79.6096
389.913	0.411697	17.454	151	9	5.96026	2D-disc	False	79.614
306.388	0.499807	11.3147	151	9.33333	6.18102	2D-disc	False	79.7364
661.981	0.078155	156.342	151	7.66667	5.07726	2D-disc	False	79.7392
585.643	0.46766	23.1291	151	8	5.29801	2D-disc	False	79.7884
424.86	0.454085	17.3013	151	5	3.31126	2D-disc	False	79.883
607.766	0.598172	18.7883	151	2.33333	1.54525	2D-disc	False	79.8843
668.589	0.172136	71.8481	151	4.33333	2.86976	2D-disc	False	79.9119
630.775	0.082927	140.977	151	10.3333	6.84327	2D-disc	False	80.067
779.042	0.426255	33.8923	151	11.3333	7.50552	2D-disc	False	80.1112
385.216	0.692988	10.3084	151	9	5.96026	2D-disc	False	80.1118
290.09	0.180495	29.8328	151	13.3333	8.83002	2D-disc	False	80.188
312.269	0.280332	20.6779	151	6.66667	4.41501	2D-disc	False	80.1923
358.42	0.047056	141.536	151	11.6667	7.72627	2D-disc	False	80.2738
701.694	0.281036	46.4271	151	7	4.63576	2D-disc	False	80.3284
230.448	0.028914	148.414	151	104.667	69.3157	2D-disc	False	80.4437
473.104	0.416529	21.1557	151	7.33333	4.85651	2D-disc	False	80.4636
735.898	0.226805	60.4887	151	8	5.29801	2D-disc	False	80.5364
569.169	0.265333	39.9921	151	5.66667	3.75276	2D-disc	False	80.5394
183.405	0.19668	17.3931	151	56	37.0861	2D-disc	False	80.5769
611.173	0.161803	70.4577	151	5	3.31126	2D-disc	False	80.5814
495.87	0.065184	142.046	151	6.66667	4.41501	2D-disc	False	80.6654
386.196	0.127002	56.7827	151	5.33333	3.53201	2D-disc	False	80.6682
626.486	0.190229	61.5168	151	11.3333	7.50552	2D-disc	False	80.6942
772.285	0.710247	20.3359	151	14.6667	9.71302	2D-disc	False	80.7941
757.197	0.186078	76.1381	151	12.3333	8.16777	2D-disc	False	80.8299
195.64	0.487358	7.51911	151	83	54.9669	2D-disc	False	80.9173
456.69	0.203227	42.1541	151	2.33333	1.54525	2D-disc	False	81.037
544.558	0.739768	13.813	151	5.66667	3.75276	2D-disc	False	81.0633
671.081	0.531509	23.7055	151	6.66667	4.41501	2D-disc	False	81.109
442.076	0.467931	17.7451	151	5.33333	3.53201	2D-disc	False	81.1422
390.976	0.093911	78.2542	151	8.33333	5.51876	2D-disc	False	81.2003
534.074	0.482368	20.8112	151	1.66667	1.10375	2D-disc	False	81.2004
238.681	0.754653	5.94793	151	46.6667	30.9051	2D-disc	False	81.2417
280.318	0.172519	30.5683	151	5	3.31126	2D-disc	False	81.2719
386.788	0.887077	8.20965	151	3.66667	2.42826	2D-disc	False	81.3385
396.197	0.129506	57.6033	151	6.66667	4.41501	2D-disc	False	81.341
273.479	0.034484	149.328	151	53.6667	35.5408	2D-disc	False	81.3428
391.444	0.111393	66.1889	151	3.66667	2.42826	2D-disc	False	81.3687
457.366	0.098884	87.1843	151	7	4.63576	2D-disc	False	81.4299
660.759	0.123052	101.236	151	8.33333	5.51876	2D-disc	False	81.4451
214.757	0.211604	19.1431	151	15.6667	10.3753	2D-disc	False	81.4842
653.516	0.558633	22.0776	151	5	3.31126	2D-disc	False	81.5279
685.158	0.580418	22.3127	151	13.6667	9.05077	2D-disc	False	81.6554
544.768	0.08317	123.824	151	7	4.63576	2D-disc	False	81.6665
668.011	0.751242	16.8167	151	5	3.31126	2D-disc	False	81.6998
590.219	0.798478	13.9829	151	7.66667	5.07726	2D-disc	False	81.7206
718.912	0.088251	154.409	151	5.33333	3.53201	2D-disc	False	81.8843
265.946	0.931325	5.41845	151	22.3333	14.7903	2D-disc	False	81.9721
300.82	0.42771	13.3493	151	10.3333	6.84327	2D-disc	False	81.9945
690.138	0.215977	60.6666	151	8	5.29801	2D-disc	False	82.0172
303.681	0.090963	63.4219	151	5.33333	3.53201	2D-disc	False	82.0674
274.756	0.918488	5.68359	151	26	17.2185	2D-disc	False	82.0791
431.896	0.367477	22.3489	151	2.66667	1.766	2D-disc	False	82.1467
511.715	0.364459	26.6997	151	15.6667	10.3753	2D-disc	False	82.1507
466.555	0.431179	20.591	151	9	5.96026	2D-disc	False	82.2084
494.364	0.106555	88.3355	151	6	3.97351	2D-disc	False	82.2518
184.852	0.403981	8.71268	151	103.333	68.4327	2D-disc	False	82.257
652.206	0.09867	125.881	151	14	9.27152	2D-disc	False	82.2702
535.173	0.68198	14.9501	151	3.66667	2.42826	2D-disc	False	82.3011
671.571	0.618989	20.7105	151	12	7.94702	2D-disc	False	82.4642
360.742	0.141666	48.6361	151	3.66667	2.42826	2D-disc	False	82.5109
471.144	0.412685	21.8256	151	4.66667	3.09051	2D-disc	False	82.5878
666.19	0.273453	46.6502	151	7	4.63576	2D-disc	False	82.7221
295.436	0.12613	44.8649	151	10.3333	6.84327	2D-disc	False	82.7457
681.124	0.121306	107.552	151	10	6.62252	2D-disc	False	82.7483
543.73	0.775109	13.4426	151	3	1.98676	2D-disc	False	82.7839
718.05	0.409856	33.6009	151	10	6.62252	2D-disc	False	82.8536
697.14	0.201474	66.3736	151	13.3333	8.83002	2D-disc	False	82.8663
752.862	0.260161	55.5228	151	5.66667	3.75276	2D-disc	False	82.8861
495.777	0.071842	132.561	151	9.33333	6.18102	2D-disc	False	82.9836
396.233	0.427932	17.7901	151	5.33333	3.53201	2D-disc	False	83.0015
573.692	0.819459	13.4586	151	4.66667	3.09051	2D-disc	False	83.0486
638.363	0.384867	31.891	151	7.33333	4.85651	2D-disc	False	83.0606
432.925	0.09423	88.3629	151	9	5.96026	2D-disc	False	83.0865
559.297	0.987056	10.9009	151	2.66667	1.766	2D-disc	False	83.1084
737.285	0.139199	101.92	151	7.66667	5.07726	2D-disc	False	83.1272
338.063	0.433289	15.0137	151	4	2.64901	2D-disc	False	83.1289
514.929	0.158243	62.6449	151	5.66667	3.75276	2D-disc	False	83.1663
480.642	0.495569	18.6807	151	4.66667	3.09051	2D-disc	False	83.2067
733.133	0.113605	124.31	151	2	1.3245	2D-disc	False	83.2153
530.358	0.148846	68.7057	151	6	3.97351	2D-disc	False	83.2999
534.188	0.147214	70.0046	151	6.66667	4.41501	2D-disc	False	83.3423
243.81	0.453082	10.3843	151	31.3333	20.7506	2D-disc	False	83.3652
471.797	0.360732	25.2458	151	6.66667	4.41501	2D-disc	False	83.3879
562.297	0.094952	114.316	151	8.66667	5.73951	2D-disc	False	83.3933
591.763	0.173006	66.0683	151	5.33333	3.53201	2D-disc	False	83.4431
579.879	0.457557	24.4854	151	13.3333	8.83002	2D-disc	False	83.4641
761.054	0.242948	60.5321	151	13	8.60927	2D-disc	False	83.4771
566.734	0.383595	28.6404	151	8.66667	5.73951	2D-disc	False	83.7445
410.229	0.439797	18.1041	151	2.66667	1.766	2D-disc	False	83.8467
398.539	0.189995	40.7162	151	6	3.97351	2D-disc	False	83.8537
723.606	0.575344	24.4271	151	7.66667	5.07726	2D-disc	False	83.9037
543.419	0.355693	29.6783	151	3.66667	2.42826	2D-disc	False	83.9196
379.455	0.721702	10.2196	151	6.66667	4.41501	2D-disc	False	83.9685
750.07	0.243726	59.8888	151	10.3333	6.84327	2D-disc	False	84.0678
588.282	0.652576	17.5518	151	3	1.98676	2D-disc	False	84.1108
572.175	0.129561	86.0178	151	7.66667	5.07726	2D-disc	False	84.143
709.033	0.092252	149.739	151	12.3333	8.16777	2D-disc	False	84.1643
418.151	0.451663	18.0435	151	3.66667	2.42826	2D-disc	False	84.1948
732.753	0.430361	33.2087	151	5.33333	3.53201	2D-disc	False	84.258
645.639	0.180015	69.9843	151	4	2.64901	2D-disc	False	84.2953
686.532	0.566614	23.6527	151	11	7.28477	2D-disc	False	84.3316
362.719	0.495442	14.2995	151	6.66667	4.41501	2D-disc	False	84.3777
597.366	0.097271	119.959	151	6.33333	4.19426	2D-disc	False	84.3838
577.244	0.245993	45.866	151	7	4.63576	2D-disc	False	84.438
368.887	0.662288	10.8921	151	4.33333	2.86976	2D-disc	False	84.4793
776.587	0.265175	57.2818	151	9.66667	6.40177	2D-disc	False	84.4972
625.981	0.256542	47.747	151	6.66667	4.41501	2D-disc	False	84.5332
579.007	0.116843	96.9795	151	8.66667	5.73951	2D-disc	False	84.544
687.275	0.522837	25.7367	151	7	4.63576	2D-disc	False	84.5808
561.114	0.163645	67.1915	151	3.33333	2.20751	2D-disc	False	84.6545
443.358	0.074421	116.776	151	3.33333	2.20751	2D-disc	False	84.6798
469.93	0.143603	64.1477	151	9	5.96026	2D-disc	False	84.6828
492.319	0.084483	114.256	151	6.33333	4.19426	2D-disc	False	84.7002
787.907	0.165394	93.4654	151	13.6667	9.05077	2D-disc	False	84.7577
791.761	0.224804	69.1131	151	15	9.93378	2D-disc	False	84.7723
469.057	0.062854	146.465	151	20.3333	13.4658	2D-disc	False	84.7862
356.828	0.472705	14.8191	151	8.33333	5.51876	2D-disc	False	84.8081
556.522	0.273672	39.954	151	4	2.64901	2D-disc	False	84.8775
391.665	0.13284	58.0332	151	8	5.29801	2D-disc	False	85.0305
185.997	0.579652	6.32449	151	147.667	97.7925	2D-disc	False	85.1472
713.337	0.151325	93.0215	151	5	3.31126	2D-disc	False	85.2478
297.645	0.347395	16.9183	151	8	5.29801	2D-disc	False	85.3029
688.347	0.165839	81.9661	151	14.6667	9.71302	2D-disc	False	85.3096
714.49	0.430592	32.7722	151	7.33333	4.85651	2D-disc	False	85.3216
450.635	0.073839	120.603	151	9	5.96026	2D-disc	False	85.3698
210.671	0.148241	28.1039	151	31.3333	20.7506	2D-disc	False	85.4308
505.542	0.107126	93.35	151	5	3.31126	2D-disc	False	85.4547
150.636	0.434664	6.85826	151	453	300	2D-disc	False	85.4917
765.456	0.147238	103.053	151	13.3333	8.83002	2D-disc	False	85.6333
587.901	0.076077	153.332	151	15.6667	10.3753	2D-disc	False	85.7168
772.598	0.339216	45.1921	151	18.6667	12.362	2D-disc	False	85.7174
165.465	0.026294	124.959	151	393.667	260.706	2D-disc	False	85.783
595.482	0.137172	86.2078	151	9.66667	6.40177	2D-disc	False	85.7881
631.003	0.164964	76.0176	151	6.66667	4.41501	2D-disc	False	85.8531
543.132	0.157171	68.6772	151	6	3.97351	2D-disc	False	85.8546
550.593	0.173455	63.1208	151	10.6667	7.06402	2D-disc	False	85.9038
771.832	0.203705	75.4037	151	18	11.9205	2D-disc	False	85.9716
555.76	0.121456	91.1125	151	7.33333	4.85651	2D-disc	False	86.0189
715.075	0.454646	31.3373	151	5	3.31126	2D-disc	False	86.0731
495.934	0.319101	31.0059	151	4.66667	3.09051	2D-disc	False	86.1851
352.012	0.453699	15.4832	151	9	5.96026	2D-disc	False	86.2095
309.871	0.091612	67.5169	151	12	7.94702	2D-disc	False	86.232
640.002	0.121867	104.829	151	5.33333	3.53201	2D-disc	False	86.2325
688.863	0.964619	14.2561	151	23	15.2318	2D-disc	False	86.2399
243.114	0.03976	122.401	151	53.3333	35.3201	2D-disc	False	86.4783
361.979	0.207255	34.9791	151	6.66667	4.41501	2D-disc	False	86.5195
174.514	0.02846	122.89	151	337	223.179	2D-disc	False	86.5775
232.272	0.190609	24.4318	151	15.6667	10.3753	2D-disc	False	86.6135
426.159	0.411723	20.7542	151	6	3.97351	2D-disc	False	86.6209
471.824	0.149028	63.5001	151	7	4.63576	2D-disc	False	86.6455
190.217	0.430089	8.88135	151	97.3333	64.4592	2D-disc	False	86.7503
457.091	0.517581	17.7416	151	8.66667	5.73951	2D-disc	False	86.7862
510.7	0.10288	99.7311	151	4	2.64901	2D-disc	False	86.7919
566.321	0.259006	43.9661	151	4.66667	3.09051	2D-disc	False	86.8657
774.574	0.46598	33.4266	151	18.6667	12.362	2D-disc	False	86.8721
299.951	0.85404	7.0629	151	20.6667	13.6865	2D-disc	False	86.8752
729.726	0.239094	61.4476	151	4.66667	3.09051	2D-disc	False	86.9756
711.773	0.329192	43.5489	151	7	4.63576	2D-disc	False	87.0099
769.211	0.191307	80.9955	151	21.6667	14.3488	2D-disc	False	87.0222
793.103	0.21539	74.2208	151	6.33333	4.19426	2D-disc	False	87.0773
597.222	0.557115	21.6183	151	5.33333	3.53201	2D-disc	False	87.1195
723.38	0.533761	27.3547	151	5.33333	3.53201	2D-disc	False	87.196
607.747	0.121571	100.941	151	5.66667	3.75276	2D-disc	False	87.2285
350.446	0.167851	42.1677	151	6.33333	4.19426	2D-disc	False	87.2502
361.607	0.354321	20.6219	151	10.3333	6.84327	2D-disc	False	87.2918
730.295	0.958066	15.407	151	10	6.62252	2D-disc	False	87.3167
542.312	0.177313	61.844	151	5.33333	3.53201	2D-disc	False	87.352
335.659	0.890897	7.62395	151	9.33333	6.18102	2D-disc	False	87.4165
637.724	0.256993	50.2292	151	9.66667	6.40177	2D-disc	False	87.4436
442.86	0.206285	43.4744	151	6.66667	4.41501	2D-disc	False	87.4819
381.389	0.502605	15.3817	151	13.3333	8.83002	2D-disc	False	87.568
584.521	0.128673	92.1216	151	7.66667	5.07726	2D-disc	False	87.6057
510.394	0.872179	11.8687	151	5.33333	3.53201	2D-disc	False	87.617
638.249	0.208201	62.1844	151	6.66667	4.41501	2D-disc	False	87.631
640.359	0.182379	71.2714	151	5.33333	3.53201	2D-disc	False	87.6901
644.771	0.498812	26.2504	151	8.33333	5.51876	2D-disc	False	87.7308
150.845	0.024474	125.234	151	516.333	341.943	2D-disc	False	87.7772
304.656	0.062348	99.3825	151	21	13.9073	2D-disc	False	87.8632
327.355	0.752691	8.84714	151	12	7.94702	2D-disc	False	87.8789
747.783	0.980861	15.559	151	6.66667	4.41501	2D-disc	False	88.165
671.028	0.16168	84.7085	151	12	7.94702	2D-disc	False	88.1711
489.34	0.100635	99.2619	151	5	3.31126	2D-disc	False	88.187
613.942	0.494064	25.3812	151	3.33333	2.20751	2D-disc	False	88.2374
774.482	0.108208	146.195	151	22.6667	15.011	2D-disc	False	88.2396
742.582	0.105573	143.942	151	9.33333	6.18102	2D-disc	False	88.4053
151.184	0.488477	6.34593	151	509	337.086	2D-disc	False	88.5764
162.489	0.03133	106.383	151	327.333	216.777	2D-disc	False	88.6123
676.013	0.970391	14.293	151	10.6667	7.06402	2D-disc	False	88.6337
491.116	0.220497	45.7118	151	3.66667	2.42826	2D-disc	False	88.6607
778.911	0.744118	21.4916	151	8.66667	5.73951	2D-disc	False	88.6964
334.224	0.082128	83.5595	151	6.33333	4.19426	2D-disc	False	88.702
385.574	0.200098	39.583	151	5.66667	3.75276	2D-disc	False	88.7418
269.735	0.618696	8.95732	151	18.6667	12.362	2D-disc	False	88.757
169.123	0.095698	36.3346	151	71.6667	47.4614	2D-disc	False	88.8189
512.407	0.589326	17.8832	151	6.66667	4.41501	2D-disc	False	88.8524
210.412	0.491793	8.80078	151	52	34.4371	2D-disc	False	88.862
637.774	0.175625	74.7209	151	5.33333	3.53201	2D-disc	False	88.8885
481.382	0.577654	17.1521	151	3.33333	2.20751	2D-disc	False	88.9159
693.109	0.151688	94.088	151	9	5.96026	2D-disc	False	88.9545
272.882	0.119401	47.105	151	16	10.596	2D-disc	False	89.0398
476.915	0.173057	56.8421	151	4	2.64901	2D-disc	False	89.1049
787.273	0.778292	20.8744	151	9.66667	6.40177	2D-disc	False	89.1488
274.246	0.473232	11.9638	151	13.3333	8.83002	2D-disc	False	89.184
569.078	0.603514	19.4679	151	4.66667	3.09051	2D-disc	False	89.1906
532.448	0.502832	21.8635	151	4.66667	3.09051	2D-disc	False	89.1966
755.923	0.459179	34.018	151	10.6667	7.06402	2D-disc	False	89.2683
463.403	0.295773	32.449	151	3.33333	2.20751	2D-disc	False	89.4715
679.274	0.193013	72.8953	151	11	7.28477	2D-disc	False	89.4797
761.525	0.677237	23.3151	151	8.66667	5.73951	2D-disc	False	89.5732
603.798	0.109335	114.564	151	5	3.31126	2D-disc	False	89.6189
747.484	0.105231	147.481	151	9.33333	6.18102	2D-disc	False	89.6939
785.48	0.381677	42.7767	151	18.3333	12.1413	2D-disc	False	89.795
636.039	0.302673	43.719	151	3.33333	2.20751	2D-disc	False	89.8761
531.103	0.08503	129.992	151	7.66667	5.07726	2D-disc	False	89.9073
566.609	0.460941	25.597	151	3	1.98676	2D-disc	False	89.9571
611.9	0.161663	78.9754	151	4.33333	2.86976	2D-disc	False	90.1376
715.131	0.169505	88.1636	151	8	5.29801	2D-disc	False	90.2755
588.099	0.314793	39.088	151	9.66667	6.40177	2D-disc	False	90.3861
401.975	0.683388	12.3118	151	6.66667	4.41501	2D-disc	False	90.4218
786.972	0.253509	65.0059	151	12.6667	8.38852	2D-disc	False	90.463
539.921	0.211224	53.6299	151	4	2.64901	2D-disc	False	90.6366
695.284	0.394905	36.9398	151	11.3333	7.50552	2D-disc	False	90.6375
429.107	0.112072	80.4101	151	11.3333	7.50552	2D-disc	False	90.7248
328.712	0.099217	69.6434	151	10	6.62252	2D-disc	False	90.8101
783.181	0.661491	24.9423	151	13.3333	8.83002	2D-disc	False	91.0084
640.052	0.999387	13.4946	151	2.66667	1.766	2D-disc	False	91.025
355.742	0.496988	15.0824	151	2.66667	1.766	2D-disc	False	91.026
498.735	0.486752	21.6011	151	2.66667	1.766	2D-disc	False	91.0746
439.84	0.225521	41.1273	151	4	2.64901	2D-disc	False	91.0975
517.069	0.725721	15.0421	151	11	7.28477	2D-disc	False	91.2038
616.088	0.254552	51.106	151	15.3333	10.1545	2D-disc	False	91.2198
547.446	0.101681	113.722	151	6	3.97351	2D-disc	False	91.2488
713.77	0.146707	102.823	151	3.66667	2.42826	2D-disc	False	91.2991
543.521	0.645129	17.8251	151	7.66667	5.07726	2D-disc	False	91.4001
445.329	0.165201	57.0905	151	4.33333	2.86976	2D-disc	False	91.4912
691.079	0.105804	138.332	151	9	5.96026	2D-disc	False	91.4918
458.981	0.840663	11.5633	151	9.66667	6.40177	2D-disc	False	91.4939
559.303	0.161107	73.5458	151	4	2.64901	2D-disc	False	91.5184
596.518	0.084762	149.107	151	8.66667	5.73951	2D-disc	False	91.5293
799.513	0.228484	74.1888	151	14.6667	9.71302	2D-disc	False	91.591
656.654	0.230714	60.3706	151	10.3333	6.84327	2D-disc	False	91.6319
721.018	0.480974	31.8096	151	7.66667	5.07726	2D-disc	False	91.6679
152.048	0.030719	105.088	151	489.667	324.283	2D-disc	False	91.7199
377.188	0.397275	20.1591	151	4	2.64901	2D-disc	False	91.7252
689.591	0.167842	87.2548	151	6	3.97351	2D-disc	False	91.7449
608.893	0.421794	30.6749	151	6.33333	4.19426	2D-disc	False	91.7966
757.398	0.337386	47.7336	151	5.33333	3.53201	2D-disc	False	91.8566
464.872	0.448053	22.065	151	3.66667	2.42826	2D-disc	False	91.872
646.775	0.376504	36.5341	151	4.66667	3.09051	2D-disc	False	91.8753
469.752	0.9014	11.0929	151	4.66667	3.09051	2D-disc	False	91.9552
745.112	0.142423	111.41	151	7.33333	4.85651	2D-disc	False	91.9954
462.903	0.070376	140.157	151	18	11.9205	2D-disc	False	92.0521
651.788	0.103592	134.127	151	15.3333	10.1545	2D-disc	False	92.0919
696.34	0.850863	17.4483	151	9.33333	6.18102	2D-disc	False	92.1033
623.875	0.282865	47.056	151	6.66667	4.41501	2D-disc	False	92.168
656.522	0.778908	17.9868	151	19.3333	12.8035	2D-disc	False	92.1881
730.026	0.636494	24.4842	151	10.6667	7.06402	2D-disc	False	92.2199
413.76	0.992219	8.91619	151	5.66667	3.75276	2D-disc	False	92.3681
762.591	0.369829	44.1445	151	18.6667	12.362	2D-disc	False	92.4847
441.343	0.303015	31.1826	151	2.66667	1.766	2D-disc	False	92.4876
462.587	0.244292	40.5755	151	5	3.31126	2D-disc	False	92.5687
381.888	0.194476	42.1045	151	9.33333	6.18102	2D-disc	False	92.628
769.715	0.213939	77.2365	151	17.6667	11.6998	2D-disc	False	92.7399
641.367	0.10519	131.002	151	7.33333	4.85651	2D-disc	False	92.8172
250.16	0.544766	9.87165	151	25.3333	16.777	2D-disc	False	92.8679
557.025	0.164005	73.0265	151	10.3333	6.84327	2D-disc	False	92.8852
336.113	0.434227	16.651	151	8.33333	5.51876	2D-disc	False	92.9303
524.307	0.666145	16.9389	151	9.33333	6.18102	2D-disc	False	92.9719
752.052	0.681407	23.7671	151	16.6667	11.0375	2D-disc	False	93.029
636.315	0.957964	14.3046	151	4.33333	2.86976	2D-disc	False	93.0325
702.609	0.120598	125.467	151	12	7.94702	2D-disc	False	93.0338
306.795	0.046707	141.662	151	41.6667	27.5938	2D-disc	False	93.1691
151.031	0.346697	9.40299	151	414	274.172	2D-disc	False	93.2465
377.416	0.475556	17.1343	151	7	4.63576	2D-disc	False	93.2679
651.652	0.161796	86.9701	151	10.6667	7.06402	2D-disc	False	93.2836
414.087	0.230424	38.8165	151	6	3.97351	2D-disc	False	93.3116
218.095	0.057567	81.8761	151	33	21.8543	2D-disc	False	93.362
733.241	0.316079	50.1798	151	8.33333	5.51876	2D-disc	False	93.4462
597.237	0.101037	127.898	151	11	7.28477	2D-disc	False	93.4719
552.647	0.32742	36.539	151	2.66667	1.766	2D-disc	False	93.5185
574.454	0.210944	58.9595	151	3	1.98676	2D-disc	False	93.5295
778.263	0.312582	53.9459	151	11.6667	7.72627	2D-disc	False	93.6008
713.473	0.328956	47.0113	151	7.33333	4.85651	2D-disc	False	93.6367
241.309	0.136458	38.3408	151	21.6667	14.3488	2D-disc	False	93.6634
655.476	0.228837	62.1121	151	9	5.96026	2D-disc	False	93.6762
436.111	0.10664	88.7414	151	3	1.98676	2D-disc	False	93.7418
[truncated: 18,003 more rows]
